1 **Running head: Beach eDNA complements human observation**

2  
3 **Title:**

4 **Beach environmental DNA fills gaps in photographic biomonitoring to track spatiotemporal**  
5 **community turnover across 82 phyla**

6  
7  
8 **Authors:** Rachel S. Meyer<sup>1\*</sup>, Teia M. Schweizer<sup>1†\*</sup>, Wai-Yin Kwan<sup>1</sup>, Emily Curd<sup>1</sup>, Adam Wall<sup>2</sup>, Dean  
9 Pentcheff<sup>2,3</sup>, Regina Wetzer<sup>2</sup>, Eric Beraut<sup>1</sup>, Alison Young<sup>3</sup>, Rebecca Johnson<sup>3</sup>, Robert K. Wayne<sup>1</sup>

10 \* Co-first author

- 11  
12 1. UCLA Dept of Ecology and Evolutionary Biology, Los Angeles CA 90095  
13 2. Natural History Museum of Los Angeles Marine Biodiversity Center, Los Angeles CA 90007  
14 3. California Academy of Sciences, San Francisco CA 94118

15 † Present address: Colorado State Univ Dept of Biology, Fort Collins CO 80523

16 RS Meyer and TM Schweizer should be considered joint first author

17 \* Corresponding author: 001-206-351-7997; rsmeyer@g.ucla.edu

18  
19  
20 **Keywords: tidepools, iNaturalist, biodiversity, holobiome, DNA metabarcoding, marine protected**  
21 **areas**

22  
23  
24  
25 **Acknowledgements:** Support for this project was provided by the University of California Catalyst  
26 Program CA-16-376437. We thank the volunteers who collected CALeDNA samples and iNaturalist  
27 observations. We thank M. Delaney of NOAA and thank the California Dept. of Fish and Wildlife for  
28 assistance with permits and permissions. We thank M. Lin, and Z. Gold for assistance with analyses. The  
29 authors (AW, NDP, RW) graciously acknowledge NHM Marine Biodiversity Center infrastructure support  
30 from colleagues, Kathy Omura and Jenessa Wall. This is Contribution Number 5 of the NHM Diversity  
31 Initiative of the Southern California Ocean.

32  
33 **Author Contributions:** RSM, TMS, EC, AY, RJ, and RKW designed the study, with WK and AW designing  
34 and performing additional analyses. RSM, TMS, EC, and RKW generated the eDNA data, DP and RW  
35 contributed DNA reference data and analyzed taxonomic results. RSM, EB and WK managed the data. All  
36 authors contributed to analyses and to writing the manuscript.

44 **Abstract:**

45 Environmental DNA (eDNA) metabarcoding is emerging as a biomonitoring tool available to the citizen  
46 science community that promises to augment or replace photographic observation. However, eDNA  
47 results and photographic observations have rarely been compared to document their individual or  
48 combined power. Here, we use eDNA multilocus metabarcoding, a method deployed by the CALeDNA  
49 Program, to inventory and evaluate biodiversity variation along the Pillar Point headland near Half Moon  
50 Bay, California. We describe variation in presence of 13,000 taxa spanning 82 phyla, analyze  
51 spatiotemporal patterns of beta diversity, and identify metacommunities. Inventory and measures of  
52 turnover across space and time from eDNA analysis are compared to the same measures from Global  
53 Biodiversity Information Facility (GBIF) data, which contain information largely contributed by iNaturalist  
54 photographic observations. We find eDNA depicts local signals with high seasonal turnover, especially in  
55 prokaryotes. We find a diverse community dense with pathogens and parasites in the embayment, and a  
56 State Marine Conservation Area (SMCA) with lower species richness than the rest of the beach  
57 peninsula, but with beta diversity signals showing resemblance to adjacent unprotected tidepools. The  
58 SMCA differs in observation density, with higher density of protozoans, and animals in Ascidiacea,  
59 Echinoidea, and Polycladida. Local contributions to beta diversity are elevated in a section of East-facing  
60 beach. GBIF observations are mostly from outside the SMCA, limiting some spatial comparisons.  
61 However, our findings suggest eDNA samples can link the SMCA sites to sites with better GBIF inventory,  
62 which may be useful for imputing species from one site given observations from another. Results  
63 additionally support >3800 largely novel biological interactions. This research, and accompanying  
64 interactive website support eDNA as a gap-filling tool to measure biodiversity that is available to  
65 community and citizen scientists.

66

67 **1. Introduction:**

68  
69 The 6th mass extinction now underway is projected to affect a million species (Diaz et al., 2019), and  
70 consequently, scientists and the public need to catalyze the development of next-generation  
71 biodiversity monitoring strategies for a comprehensive inventory of biodiversity (National Research  
72 Council, 2001). Our interest is in a strategy that activates a public constituency with access to the latest  
73 digital and molecular tools and an understanding of the data and results so they can innovate solutions  
74 together with the scientific community. Volunteers for citizen and community science outnumber  
75 professional scientists 18 to 1 (Groom et al., 2017), and have contributed a substantial amount of  
76 observational data points that are now used to track biodiversity variation over space and time (Bird et  
77 al., 2014). One major source of observations is the iNaturalist community science platform [Cal Academy  
78 of Sciences (CAS) and National Geographic Society], which has exceeded 12 million ‘research grade’, or  
79 photographed and validated, records. For certain species and localities, these observations comprise the  
80 bulk of data points over other occurrence data, such as museum and voucher specimens. iNaturalist and  
81 other volunteer-collected species occurrence records (such as eBird) help populate the Global  
82 Biodiversity Information Facility (GBIF; Robertson et al., 2014), which also includes collection and  
83 observation data curated by thousands of institutions (n=1332 ‘publishers’ as of January 11, 2019).  
84 Citizen and community scientists are eager to be data contributors and deepen their involvement in  
85 knowledge assessment and possible conservation actions, (Hecker et al., 2018). Everyone is impacted by  
86 the challenges of biodiversity loss.

87  
88 Environmental DNA (eDNA) presents an attractive method for obtaining alternative biodiversity data.  
89 The method is considered non-invasive as small amounts of soil, sediment, or water are sufficient for  
90 DNA extraction, which can be easily collected by volunteers or passively collected with unmanned  
91 devices. eDNA can be subjected to multilocus metabarcoding and next-generation sequencing,

92 producing snapshots that span all kingdoms of life. However, because we don't have sufficient DNA  
93 barcodes for all species, sometimes there are insufficient data to resolve taxonomy or avoid  
94 mismatches. DNA research in the environment is also limited by the non-even distribution of DNA from  
95 taxa (especially inshore and terrestrial environments; O'Donnell et al. 2017), where small bodied and  
96 more evenly distributed species have better detectability over large mobile organisms (Zinger et al.  
97 2019a). Therefore, eDNA-based biodiversity inventories may benefit from complementation with other  
98 evidence-based observations such as photos or specimens. Nonetheless, the sheer data-richness of  
99 eDNA may elucidate robust metacommunities with dynamics that inform ecosystem management (e.g.  
100 Peters et al., 2019) and that may even allow imputation about the presence of larger organisms from  
101 their associated smaller taxa comprising their holobiomes (i.e. the total genomes in and on a eukaryotic  
102 organism, possibly functioning together as evolutionary units; Guerrero et al., 2013). However, as a  
103 nascent field, this topic has hardly been explored.

104  
105 Photographic observations present challenges that systematic collection of eDNA may help resolve.  
106 Diversity estimates are limited to where people choose to go, to what people decide to photograph or  
107 sample, or to where camera traps are installed. Further, by the nature of photographs, it is mainly  
108 relatively large or morphologically apparent, diurnal organisms. How can eDNA surveys augment or  
109 predict taxa in observational databases? If eDNA provides a next-generation biodiversity assessment  
110 tool, how can it be integrated into biomonitoring by the public and scientists? By using eDNA samples to  
111 fill information gaps and stimulate broader human observation, can we mitigate taxon (e.g. plant  
112 blindness; Allen, 2003) and visitation bias?

113  
114 This study presents an analysis of eDNA metabarcoding collected through community science effort of  
115 the CALeDNA program ([www.ucedna.com](http://www.ucedna.com); Meyer et al., 2019). Our analysis focuses on an inventory of

116 biotic communities on the Pillar Point headland California beach that has been previously been  
117 intensively surveyed by the California Academy of Sciences (CAS) Citizen Science team  
118 (<https://www.inaturalist.org/projects/intertidal-biodiversity-survey-at-pillar-point>). The beach has a  
119 marshland and harbor graded C-F for water quality on the Heal the Bay Beach Report Card (2016;  
120 [healthebay.org](http://healthebay.org)), signaling it is polluted and potentially under threat. It also has a State Marine  
121 Conservation Area (SMCA) with restricted fishing, that is difficult to access by land, which received  
122 grades A-C. It remains unclear how biologically different these areas are. We compare eDNA results to  
123 human observation records (GBIF; largely including iNaturalist research grade observations) to  
124 determine their complementarity and the value of each to fill gaps where data are limited across space  
125 and time. We find eDNA and photographs have little overlap, with eDNA covering lower trophic.  
126 Systematic collection of eDNA can describe differences spatial and temporal biodiversity variation of the  
127 beach, and provides a rich view of the community ecological network, including holobiomes. Even  
128 though this is only a single case study, our results suggest that eDNA may be useful to find surrogate  
129 sites where GBIF data is readily collected, which may be useful proxies for diversity in sites that are  
130 difficult for the volunteer community to monitor with photographs. With community empowerment as  
131 the goal, results in this paper are paired with interactive web pages for the public, who are potential  
132 eDNA adopters, to explore ([https://data.ucedna.com/research\\_projects/pillar-point?](https://data.ucedna.com/research_projects/pillar-point?)).

133

## 134 **2. Materials and Methods:**

135 Detailed methods including commands for running programs are in the Supplemental Methods.

136

### 137 *2.1. Sample collection for eDNA*

138 Samples of soil, sand and sediment for eDNA analysis were collected at Pillar Point by a total of fifteen  
139 community scientists and three UCLA researchers during low-tide windows of three days: February 8,

140 2017, April 29, 2017 and April 30, 2017. Our definition of community scientist is a volunteer participating  
141 in a science project, which could be designed and empowered by non-professional scientists or  
142 organized by professional scientists [see Meyer and Drill (2019) for further discussion]. The February  
143 sampling date coincided with the monthly Pillar Point survey organized by CAS Citizen Science Academy  
144 staff, which selects seasonally low tides for observation. In February, most eDNA samples were only  
145 collected near or above the mean high water line (aka mean high tide mark; MHT) because of permit  
146 restrictions. Most sites below the MHT line were sampled in April, as were all SMCA samples. Collections  
147 were made under permit MBNMS-2017-019 issued by the NOAA Office of National Marine Sanctuaries.  
148 Sample metadata are provided in Table S1.

149  
150 For the eDNA collection, sample collectors were organized into groups to cover different areas of the  
151 Pillar Point headland. Sample collectors then spread out and selected sites that looked like a typical  
152 representation of the local environment. Surface soil, sand, or submerged sediment were collected  
153 following the CALeDNA community science program instructions, which required fresh gloves to be  
154 worn at each sampling site, three 'biological replicates' of 2 mL cryotubes to be filled with substrate  
155 approximately 30 cm apart from each other. Sampling was limited to the exposed (top 3 cm layer)  
156 surface or submerged sediment no deeper than could be reached at arm's length. Collectors used a  
157 Kobo Toolbox phone webform (<https://ee.kobotoolbox.org/x/#Y1sl>) to record sampling time,  
158 geolocation, photographs of the sampling site, and other metadata. Metadata for each sample are  
159 available through [data.ucedna.com](http://data.ucedna.com). Photographs were later used to confirm environmental metadata  
160 (Table S1) for the sites. All collection instructions, data and photographs are published online in the  
161 CALeDNA database at [www.ucedna.com](http://www.ucedna.com).

162

163 *2.2. Assembling observation records*

164 GBIF records from all contributors were downloaded September 4, 2018 from GBIF using drawn  
165 polygons on a map of Pillar Point (coordinates and download DOI in Appendix 1). eBird observations  
166 were removed because they were concentrated only in the embankment. A total of 13,924 occurrence  
167 records were retained. The polygons correspond to the headland embayment, unprotected reef area,  
168 and SMCA protected area (data in Table S2).

169

### 170 *2.3. eDNA metabarcoding library preparation and sequencing*

171 Subsamples of equal mass of all three biological replicates were pooled and homogenized. A ~0.25g  
172 amount of the subsample was extracted with the Qiagen DNeasy PowerSoil Kit according to  
173 manufacturer's instructions (Qiagen, Valencia, CA, USA). Kit details provided by the manufacturer  
174 demonstrate retrieval of amplifiable DNA from bacteria, fungi, algae, and animals. A blank PowerBead  
175 tube was extracted alongside each batch of ~10 samples as a negative extraction control. Eight DNA  
176 extraction controls were pooled into a single sample used in all PCR amplifications.

177

178 Sample DNA was amplified for targeted taxa using four primer sets based on the following universal  
179 primers with a Nextera adaptor modification: MiFish *12S* (Universal Teleost; Miya et al. 2015), *16S* (515D  
180 and 806R; Caporaso et al., 2012), *18S* (V8-V9; Amaral-Zettler et al., 2009; Bradley et al., 2016), and the  
181 partial sequence of *Cytochrome Oxidase Subunit 1 (CO1)*; mlCOLintF and jgHCO2198; Leray et al., 2013).  
182 Primer sequences are included in Supplemental Methods. Three PCR replicates were run per amplicon  
183 per sample, and these were pooled and converted to Nextera libraries (details in Supplemental  
184 Methods), and sequenced using a MiSeq Illumina Next Generation Sequencer with Reagent Kit V3 (2 x  
185 300 bp) at a goal depth of 25,000 reads in each direction per marker per sample. The original run  
186 produced reverse reads with lower than standard quality, and so the run was repeated. Both runs were  
187 analyzed separately and resulting tables were merged.

188

189 *2.4. eDNA classification*

190 Demultiplexed library Fastq files were processed with the *Anacapa Toolkit* (archived version  
191 (doi:10.5281/zenodo.3064152)([github.com/limey-bean/Anacapa](https://github.com/limey-bean/Anacapa); Curd et al., 2019) using default  
192 parameters. In brief, reads were processed first by *cutadapt* (Martin, 2011) to remove adapters and any  
193 3' primer reverse complement. Reads were quality trimmed with the *FastX-Toolkit*  
194 ([http://hannonlab.cshl.edu/fastx\\_toolkit/](http://hannonlab.cshl.edu/fastx_toolkit/)) and only reads with a minimum length over 100 bp were  
195 retained. *Cutadapt* was used to sort reads by primer and then used to remove primers. Read bins were  
196 denoised, dereplicated and merged or retained as paired unmerged, forward-only or reverse-only reads  
197 using *dada2* (Callahan et al., 2016). Chimeras were additionally removed using *dada2*. This produced  
198 amplicon sequence variants (ASVs) that were then processed using *Bowtie 2* (Langmead and Salzberg,  
199 2012) to query custom reference databases (described in the following paragraph) and determine up to  
200 100 reference matches with a minimum percent coverage of the sample read set to 70% for *CO1*, 80%  
201 for all others and a minimum percent identity of 70% for *CO1*, and 90% for all others. Details on how  
202 these settings were chosen are in Supplemental Methods and Table S3. Reads per taxon were compiled  
203 for each marker using a minimum bootstrap classifier confidence (BCC) = 60 for *16S*, *12S*, and *18S*, and a  
204 minimum BCC = 70 for *CO1*.

205

206 Reference databases for *16S*, *18S*, *CO1*, and *12S* were generated with the *CRUX* step of the *Anacapa*  
207 *Toolkit* (Curd et al., 2019 ;DOI: <https://doi.org/10.5061/dryad.mf0126f>) that queried NCBI nr/nt  
208 databases. The *CO1* database was subsequently modified by appending all BOLD *CO1-5P* sequences,  
209 accessed via the BOLD API on September 24, 2018 and comprising 5.08 million sequences, and also  
210 appending 847 recently generated invertebrate *CO1-5P* barcode sequences from the LACM DISCO  
211 program (subsequently published in BOLD with the same identifiers). The *CO1-5P* region is the most



212 commonly used CO1 locus, described first by Folmer et al (1994) and it includes our amplified region.

213 These reference databases are permanently archived [*in DRYAD – link pending*].

214

215 BOLD and NCBI use different classifications systems for higher taxonomy (order to superkingdom).

216 Results tables originally had taxon strings that could be a mixture of classifications. We united them

217 using the higher classification by Ruggiero et al. (2015; online version) for all results tables and merged

218 rows with identical names by summing column read counts. This procedure was only used for

219 decontaminated results.

220

221 For *16S*, *18S*, and *12S* markers, we statistically removed reads and taxa considered contaminants using

222 the program *Decontam* version 1.1.2 (Davis et al., 2018) with prevalence method and the threshold

223 setting of 0.1. Taxa with only a single total read were subsequently removed in the final results (Tables

224 S4-S7).

225

226 For *CO1*, because there were few taxa that overlapped between real samples and extraction or PCR

227 negative controls, results tables were decontaminated simply by removing any taxon that was present in

228 one or more reads in controls. The extraction and PCR negative controls contained a total of three taxa,

229 two being single reads in either control or real sample, and one that did occur as 9 reads in a control and

230 in more reads in four real samples, which was *Nutricula tantilla* Gould, a very small clam. We did not

231 include this taxon in results, and note it was not in GBIF Pillar Point data but is known from California

232 (GBIF.org). Singletons were also subsequently removed.

233

234 Using the *CO1* results, we further examined possible contaminants by heeding Zinger et al., (2019b) who

235 describe the various contamination issues, specifically, the risk of index hopping among samples in the

236 same MiSeq run. We looked for cross-contamination between the Pillar Point samples, which were the  
237 ~54% of the identified reads on the MiSeq run, and California Vernal Pool samples which were largely  
238 the remainder of the run, and found only 43 taxa overlapped, 15 of which were singletons in the Pillar  
239 Point samples, and 34 of which were soil-dwelling Ascomycota or amoeba that could theoretically occur  
240 in both habitats (Table S6). Not one read of known vernal pool-specific animals, which each had >2500  
241 reads in the vernal pool samples, were recovered in Pillar Point samples (e.g., *Gammarus cf. fossarum*,  
242 or *Alona*, which are usually found in ephemeral freshwaters and known from vernal pools; Keeley and  
243 Zedler, 1998; Hupalo et al., 2018). We also counted the amount of PhiX in sample libraries using BBDuk  
244 (BBMap – Bushnell B. – [sourceforge.net/projects/bbmap/](https://sourceforge.net/projects/bbmap/)), and found it was (<8e-05) in each library. We  
245 found these low occurrences of contamination from extraction or index-hopping suggested further  
246 decontamination steps were unnecessary. The *Anacapa* output results including the non-Pillar Point  
247 samples, and files detailing sequences themselves and other details of taxonomy assignment  
248 confidence, are provided for *CO1* in Table S6.

249  
250 Alpha diversity analyses used a stricter filter of a minimum of five reads to reduce some inflation effects  
251 from ASVs. All analyses requiring rarefaction used settings retaining 2000 reads for *18S* or *CO1*, and  
252 4000 reads for *16S*, aiming for a cutoff above the linear growth zone of the curve. Rarefaction curves  
253 used to inform the sequence number for rarefaction are shown in Figure S1.

254  
255 *2.5. Global biotic interactions (GloBI)*

256 We downloaded all of the open access GloBI species interactions database (Poelen et al., 2014;  
257 <http://globalbioticinteractions.org>) on September 2, 2018, totaling 3,293,470 records. These data were  
258 used in two tests. First, we retrieved all the species that had 10 or more observations from the Intertidal  
259 Biodiversity Survey at Pillar Point in iNaturalist (<https://www.inaturalist.org/projects/intertidal->

260 [biodiversity-survey-at-pillar-point?tab=species](#)), and searched for all GloBI records of interactions  
261 involving these frequently observed species ([Biotic Interactions](#)). We screened the list of interacting taxa  
262 for overlap with GBIF species and eDNA species and reported these. Second, we summarized all GloBI  
263 interactions to family level, and recorded the interaction type. We used the major categories of “eats”  
264 or “interacts\_with” to tally the frequency with which the families detected in eDNA or GBIF are on  
265 source or sink for these interactions, and used these sums in Chi-Square tests in *R* (version 3.5.0) to test  
266 for overrepresentation of interaction source or sinks in eDNA and GBIF results.

267

## 268 2.6. Statistical analyses for diversity and enrichment

269 The *16S*, *18S*, and *CO1* results (Tables S4-S7) were used to generate separate alpha diversity and beta  
270 diversity plots, and used to calculate statistics including Local Contributions to Beta Diversity (LCBD) and  
271 Analysis of Similarity (ANOSIM). To prepare results for these tests and plots, decontaminated Anacapa  
272 results tables and metadata were converted to *Phyloseq* objects (McMurdie and Holmes, 2013) using  
273 the `convert_anacapa_to_phyloseq` function in the *Ranacapa* version 0.1.0 (Kandlikar et al., 2018) *R*  
274 package in *R* version 3.5.0. *Phyloseq* and *microbiomeSeq* *R* package version 0.1

275 (<https://github.com/umerijaz/microbiomeSeq.git>) were used to calculate richness, Simpson, and  
276 Shannon alpha diversity and test for significant differences among groups with ANOVA set to  $P=0.05$ .  
277 Plots were made using *ggplot2* (Wickham 2009). Full scripts are provided in Supplemental Methods.

278

279 Beta diversity as relative abundance barplots and LCBD statistics were generated in *R* using the addition  
280 of the *adespatial* (multivariate multiscale spatial analysis) package version 0.3.2 function selecting the  
281 Hellinger dissimilarity coefficients method (Dray et al., 2016). ANOSIM beta diversity statistics and  
282 distance plots were computed using both Jaccard and Raup-Crick dissimilarity indices (Raup and Crick,  
283 1979). Both treat the data as presence/absence but Raup-Crick considers underlying alpha diversity, as

284 calculated in the Vegan vegdist method (Chase et al., 2011; Oksanen et al. 2018) in *Phyloseq*. Principal  
285 Coordinate Ordinations were made using the Jaccard method.

286

287 We performed density enrichment tests in *R* using the following approach. Taxon results tables were  
288 summarized by class and converted to sample presence/absence tables. Kruskal-Wallis rank sum tests  
289 (Hollander, et al., 2013) were performed to identify classes with significant differences among zone  
290 groups. Then, significant classes were subjected to the post-hoc Dunn test (Dunn, 1964) using the  
291 Benjamini-Hochberg (Benjamini and Hochberg, 1995) correction for multiple testing.

292

### 293 *2.7. Community ecological network analyses*

294 Network analysis was performed using the *SpiecEasi* version 1.0.2 package (Kurtz et al., 2015; Tipton et  
295 al., 2018) in *R* with the *18S*, *16S*, and *CO1* results tables summarized to the highest resolution  
296 classification of family. We did not include *12S* because the taxon list was short. Family-level results  
297 tables were filtered to retain only taxa minimally present in 15% of the sites. Results from each marker  
298 were processed separately, and then *16S* was co-analyzed with each of the dominantly eukaryotic  
299 markers *18S* and *CO1*. Settings and commands are in Supplemental Methods, as are commands for  
300 plotting networks using *Phyloseq* and *iGraph* (Csardi and Nepusz, 2006). Networks were additionally  
301 plotted as interactive figures using Flourish Studio (<https://app.flourish.studio>; London, UK), given a  
302 stable DOI, and were hosted on our Pillar Point project website

303 ([https://data.ucedna.com/research\\_projects/pillar-point?](https://data.ucedna.com/research_projects/pillar-point?)). Interactions were also deposited in GloBI (  
304 [https://github.com/beraute/Pillar\\_Point\\_16S\\_18S](https://github.com/beraute/Pillar_Point_16S_18S), [https://github.com/beraute/Pillar\\_Point\\_CO1\\_16S](https://github.com/beraute/Pillar_Point_CO1_16S)).

305

306 We asked what proportion of observed eDNA network interactions were previously published, and  
307 tested this by comparing *18S* network taxa with 10 or more edges (highly networked) to interactions  
308 published in the GloBI database (Section 2.5). Lists were assembled and compared in Microsoft Excel.

309

#### 310 2.8. Reduction of holobiome effects

311 For the *18S* results, we tested the influence of DNA swamping from organisms and their associated  
312 community (holobiome) on local contribution to beta diversity (LCBD) scores. We screened the *18S*  
313 rarified DNA results for taxa with >50% proportion of the read abundance. Community ecological  
314 networks (Section 2.7) were mined for these organisms and their linked taxa, and all these taxa were  
315 filtered out to produce new results tables. These holobiome-filtered tables were used in LCBD  
316 calculations as described in Section 2.6.

317

#### 318 2.9. GBIF and eDNA comparisons

319 GBIF and eDNA results use different classification systems. The classification at each hierarchical level  
320 was converted to a common NCBI-style taxonomy using the Global Names tool  
321 (<http://globalnames.org>). This tool has been shown to increase the success of cross-mapping taxon  
322 names to up to 90% across diverse databases (Patterson et al., 2016); in accordance with this number,  
323 under 10% of taxa had to be dropped because they could not be converted. This slightly reduced set of  
324 converted names is presented on the web platform.

325

#### 326 2.10. Development of the web interface and comparative summary statistics

327 A web platform was created linking Squarespace, Amazon Web Services, and Heroku. Numerous data  
328 visualization tools such as leaflet were used to create the user interface, and images were scraped from

329 Encyclopedia of Life (eol.org), GBIF (gbif.org) iNaturalist and Wikipedia. All scripts to generate the pages  
330 are open source and available on Github at <https://github.com/UCcongenomics/caledna>.

331

## 332 **Results**

333

### 334 *3.0. Orientation*

335 Pillar Point headland contains a 1 km East-facing stretch that spans a small protected marsh with  
336 agricultural runoff feeding into an embayment that contains a harbor with primarily fishing and  
337 recreational crafts (Figure 1). The marsh supports a diversity of seabirds and shorebirds. The entire area  
338 is bounded by a stone embankment (breakwater). A 0.4 km stretch of South-facing ‘outer’ beach has an  
339 extended 0.3 km tidepool accessible during very low tides that receives heavy recreational traffic and  
340 visits from school groups as well as commercial and recreational collection of mollusks and fish. North of  
341 the tidepools on the West ‘outer’ beach (Figure 1) is a 0.8 km stretch that includes the Pillar Point State  
342 Marine Conservation Area (SMCA). The SMCA places limits on recreational and commercial fishing, but  
343 not access for recreational users (Marine Life Protection Act of 1999).

344

345 We examined the inventory of taxonomic biodiversity at Pillar Point beach from eDNA results and GBIF  
346 records, grouping data in several ways. The beach areas were divided into three polygons drawn on a  
347 map: 1) unprotected “embayment”; 2) “unprotected” exposed beach and tidal pools; and 3) “protected”  
348 exposed beach of the SMCA (Figure 1A, 1B). We also divided the beach into five zones: 1) area exposed  
349 to marsh runoff; 2) unprotected inner beach; 3) unprotected outer beach; 4) unprotected tidepools; and  
350 5) protected outer beach (SMCA). The total taxa observed (Figure 1D) were used to compare  
351 biodiversity among the polygons. We added metadata for each sampling site that included the month  
352 collected, the position relative to the mean-high-tide (MHT) line, and the substrate.

353  
354 Comparative analyses of eDNA (Tables S4-S7) and GBIF results (Appendix 1; Table S2) assessed species in  
355 common, differences in estimates of taxon distribution, richness, beta-diversity within and among areas  
356 of the beach (Figure 1C-F). We also evaluated the kinds of biotic interactions between taxa in both types  
357 of inventory. As a community science project, we presented interactive results to engage non-scientists  
358 and scientists alike. Those resources are available in this web platform:

359 [https://data.ucedna.com/research\\_projects/pillar-point](https://data.ucedna.com/research_projects/pillar-point) and are permanently archived in Dryad and  
360 Zenodo [PENDING MANUSCRIPT ACCEPTANCE]. In the Results, we highlight the website features  
361 intended for self-driven evaluation of eDNA and GBIF biomonitoring. The web platform explorable  
362 features are described in Table 1.

363

### 364 *3.1. eDNA taxonomic inventory and richness*

365 Multilocus metabarcoding for four gene loci targeted Bacteria and Archaea (*16S*), animals and algae  
366 (*CO1*), eukaryotes (*18S*), and fish (*12S*). *CO1* and *18S* partially overlap with regard to organisms  
367 sequenced. Libraries for 88 sites and negative controls were sequenced in two runs: 3.34 Gb of fastq  
368 data were generated in the first run (170818\_300PE\_MS1) and 12.25 Gb were generated in the second  
369 run (171006\_300PE\_MS1)(NCBI SRA *PENDING ACCEPTANCE*). Results were output from the Anacapa  
370 Toolkit (Curd et al., 2019) summarized to the Least Common Ancestor, and then taxa were removed that  
371 were found in negative controls as well as taxa with only one read across all samples, yielding 1468 total  
372 taxa for *CO1*, 2689 for *18S*, 2593 for *16S*, and 43 for *12S* (Tables S4-S7). The total unique taxa assigned to  
373 kingdoms across all eDNA results were 1132 Animalia, 27 Archaea, 2,533 Bacteria, 1,588 Chromista, 516  
374 Fungi, 433 Plantae, and 154 Protozoa, with 3 unassigned to a kingdom.

375

376 Alpha diversity, defined by Whittaker (1972), is a measure of species richness of a place. DNA  
377 metabarcoding data has been routinely used to estimate alpha diversity for a decade (Fonseca et al.,  
378 2010), and can be used for measuring genetic diversity as well as taxonomic diversity. We focus our  
379 biodiversity analyses on taxonomic diversity, presenting alpha diversity analyses and its interpretation in  
380 Appendix 2, but include an assessment of how genetic and taxonomic diversity are related (Table S8). In  
381 taxonomic alpha diversity analyses, we found seasonal and spatial differences in both prokaryotes and  
382 eukaryotes (Appendix 2; Figure S2).

383  
384 We asked how much sampling month (February or April) changed the families detected. Across the total  
385 1,388 families detected by the four markers, the average frequency a family was found was 18% (16 out  
386 of the 88 sites). The Pearson correlation ( $\rho$ ) between the normalized frequencies of these 1388 families  
387 observed in February with April was 0.81, but in repeating the test using a simple tally of whether  
388 families were observed at all in February or April, the correlation was  $\rho=0.27$ . These results, taken  
389 together with the significant spatial and temporal differences found in alpha diversity analyses  
390 (Appendix 2) support eDNA signals are spatially local and temporally restricted.

391

### 392 *3.2. eDNA-based beta diversity*

393 Analysis of Similarities (ANOSIM) beta diversity tests were performed to evaluate differences in the  
394 groupings of polygon, month, position in relation to the MHT line, and zone. Raup-Crick dissimilarity  
395 (Raup and Crick, 1979) detected fewer significant groupings than the Jaccard method (Table S9). Raup-  
396 Crick dissimilarity results showed that month was significant for all markers and had a large effect size:  
397 *18S* ( $R^2=0.76$ ), *16S* ( $R^2=1$ ), and *CO1* ( $R^2=0.53$ ). The position relative to the MHT line was significant for  
398 *16S* and *18S*, but effect size was small ( $R^2<0.08$ ). Polygon was significant for *18S* and the effect size was  
399  $R^2=0.35$ .



400

401 Jaccard dissimilarity spatial ordination analyses showed month varied predominantly along the first axis  
402 for *18S* and *16S* but not *CO1* (Figure 2). Jaccard analysis grouped by zone showed the SMCA protected  
403 polygon, only sampled in April, clustered with other April samples from the unprotected tidepools  
404 (Figure 2). We also observed that for *16S* results, inner beach samples clustered with other zones, falling  
405 either with marsh runoff samples, or as a group surrounding a dense cluster of unprotected outer beach  
406 samples. This suggests the inner beach is a zone that is heterogeneous in bacteria and archaea  
407 communities, experiencing some influence from adjacent areas as evidenced by their clustering.

408

### 409 *3.3. Interpreting and correcting Local Contributions to Beta Diversity*

410 Beta diversity estimates describe the community composition and stability across localities sampled.  
411 Barplots coloring the 21 taxa with highest relative abundance show structured community composition  
412 by month, polygon, and placement relative to the MHT line (Figure 3; Figure S3).

413

414 High relative abundance of DNA from some taxa may produce a 'swamping effect' that shrouds signal  
415 from other taxa (see discussion in Weber et al., 2017). In the *18S* barplot, 13 samples were severely  
416 swamped with DNA (>50% of the bar; Figure 3, Figure S3), from one of several taxa, belonging to  
417 anemone, worm, ciliate, diatom, and others. Samples exhibiting DNA swamping had higher Local  
418 Contributions to Beta Diversity (LCBD) than the rest (Table S10), a measure of the uniqueness of one  
419 sample compared to the rest of its group (Legendre and Caceres, 2013). LCBD has been increasingly  
420 valued for conservation applications where researchers recommend protecting sites with extreme low  
421 and high LCBD (da Silva et al., 2018). In the *18S* results of eukaryotes, there were 20 sites with significant  
422 higher or lower LCBD compared to their neighbors, 7 of which met our criteria as swamped.

423

424 We hypothesized the stability of LCBD scores was sensitive to swamping from the most abundant taxa  
425 and their associated holobiome communities, and tested this with the 18S results (Appendix 3). DNA  
426 signals from the swamping taxon were removed from results along with all of their associated taxa  
427 linked with that organism in downstream community ecological networks (Section 3.6), and then LCBD  
428 scores were recalculated. Holobiome reduction did produce lower LCBD scores for 19 samples, and only  
429 1 of the 13 originally swamped samples remained significantly different from the rest of its group (Table  
430 S10; Figure S4). The total number of significantly different samples was reduced from 20 to 9, and all  
431 had higher LCBD than others in their group.

432  
433 Eight of these nine high LCBD samples were from the cluster of the inner beach, south of the marsh. This  
434 result suggests this East-facing beach, a rarity in California, may harbor distinct communities. This inner  
435 beach is more protected from storms than outer beaches, though may be protected from marsh runoff  
436 by the breakwater. We did additional LCBD analyses to explore the similarity of values across markers  
437 (Appendix 3).

438  
439 *3.4. Enrichment tests reveal density patterns that characterize each zone*

440 To understand biological variation at the level of spatial density, which is relevant to natural areas  
441 management, we examined which classes of taxa across kingdoms differed in their density of detection  
442 among the Pillar Point beach zones (Figure 4; Table S11). We tallied the samples within zones with DNA  
443 signal from a class, and used Kruskal-Wallis and Dunn post-hoc tests to test for enrichment in the  
444 density a class was detected. Because these results have management implications, we scrutinized our  
445 taxonomic assignments to class using phylogenetic analysis and BLAST queries to vet our trust in the  
446 correct class assignment (data not shown). We found two classes that could not be clearly delimited  
447 from other classes in their respective phyla: the class Crinoidea, which typically occurs in deeper marine

448 environments could not be delimited from other Echinoderms. This may be due to size variation in *CO1*  
449 sequences for this clade, and sequence variation shared with other organisms outside of the phylum.  
450 We also could not clearly delimit Scyphozoa from Hydrozoa, but Hydrozoa were found in all eDNA  
451 samples, and therefore have no difference in density. We therefore considered the enrichment test for  
452 *putative* Scyphozoa.

453  
454 The SMCA was significantly more dense than all other zones in Echinoidea (sea urchins) and  
455 Ignavibacteria (a chemoheterotrophic bacteria) and sparser in Perkinsea (parasitic Chromista causing  
456 diseases in shellfish and amphibians)(Figure 4; Table S11). The SMCA and tidepools versus other zones  
457 were significantly denser in Nitriliruptoria (often obligate halophilic bacteria), denser in  
458 Compsopogonophyceae (a red algae), sparser in Bacilli (bacteria including anthrax), sparser in  
459 Spirochaetia (ecologically diverse bacteria that includes taxa causing syphilis and Lyme disease) and  
460 sparser in Calditrichae (bacteria with few functional attributes known). The SMCA and other beaches  
461 harbored higher density of many Animalia including tunicates in Ascidiacea (sea squirts) and  
462 Appendicularia, Polyplacophora (chitons), most Protozoa and several algae (e.g. Ulvophyceae,  
463 Rhodellophyceae) compared to the marsh area. The marsh was denser in Chromadorea (roundworms),  
464 Trematoda (flukes, parasites of mollusks and vertebrates), and Gastropoda (snails and slugs). The  
465 richness of complex lifecycle parasites in the marsh suggest high presence of mobile species and  
466 genotypic diversity, such is exemplified by high trematode density where snails and migrating birds are  
467 present (Hechinger and Lafferty, 2005; Auld and Tinsley, 2015). The marsh area has rich migrating bird  
468 diversity, tracked through eBIRD (GBIF.org; see original polygon DOI download for the embayment). The  
469 unprotected inner beach, which we note had sites with elevated LCBD scores (Section 3.3), was uniquely  
470 dense in Spartobacteria, a class of both soil-dwelling and aquatic bacteria implicated in degrading algal  
471 polysaccharides (Herlemann et al., 2013)(Figure 4).

472

473 *3.6. eDNA networks reveal previously undescribed relationships*

474 SpIEC-EASI (SParse Inverse Covariance estimation for Ecological ASSociation Inference) was used to

475 generate community networks within each marker. We analyzed results tables summarized to family

476 that were filtered for a minimum presence of 15% across the 88 sites, which left 201 *18S*, 178 *16S*, and

477 88 *CO1* families. Single marker networks were produced as well as dual marker networks to link *16S* with

478 *18S* and with *CO1*, and these were made into interactive figures for users to explore online (e.g. Figure

479 S5, *Networks* tab). Results produced over 3800 links between families. Two prominent families found to

480 be most integrated in the network were Erythrotrichiaceae (red algae) and Mytilidae (mussels) (Figures

481 S4, Table S12). We queried in the Global Biotic Interactions (GloBI) database, which aggregates

482 published interaction findings, using these two families and 25 others that all had ten or more degrees

483 in the *18S* dataset. We asked how many had published biotic interactions, and if so, how many

484 interactions were consistent. Eleven of those families had no reported interactions in GloBI (Table S13).

485 Six of those families had at least one interaction that was detected in our *18S* network (Table S12). This

486 result supports the notion that eDNA ecological networks can advance inventories of biotic interactions.

487

488 Figure 5 depicts an example of how the interaction networks can be used. The anemone family

489 (Actiniidae) multi-SpIEC-EASI network, determined by *18S* and *16S*, detected interactions with 13

490 families. The GloBI query of Actiniidae retrieved 34 interacting families as either sources or targets, but

491 only one family was also found in our results: Symbiodiniaceae. This symbiotic dinoflagellate has been

492 reported elsewhere as part of the anemone holobiome (León-Palmero et al., 2018; Muller et al., 2018).

493 Our networks also revealed a three-way link among Actiniidae, Symbiodiniaceae, and the bacteria

494 Rubritaleaceae. Weber et al. (2017) published the interactions between Rubritaleaceae and

495 Symbiodiniaceae as part of the coral microbiome. These results demonstrate networks depict candidate  
496 holobiomes and microbiomes for larger taxa that can further understanding of ecological functions.  
497

### 498 *3.7. GBIF biodiversity inventories are a different lens of biodiversity*

499 The “Intertidal Biodiversity Survey at Pillar Point” project run by CAS Citizen Science is a focused effort to  
500 specifically inventory the low-tide observable biodiversity of the unprotected area tidepools, placing  
501 emphasis on tracking certain species such as nudibranchs, and sea stars exposed to sea star wasting  
502 disease. Observations in the SMCA or embayment were opportunistic. The survey was sometimes  
503 limited when low tide occurred at night. However, the longstanding regularity of citizen science  
504 monitoring of Pillar Point (since 2012) has made this beach one of the most iNaturalist observation-rich  
505 areas in California. The Survey had 15,539 observations of 596 species on its iNaturalist page when GBIF  
506 data were obtained (as of July 5, 2018). Of these observations 12,044 observations were of 457 species  
507 and were research grade. We used these data in comparisons with eDNA to understand the differences,  
508 parallels, and complementary of the two methods for inventorying and characterizing biodiversity.

509  
510 The GBIF observations from the sum of the three polygon downloads were largely iNaturalist in origin,  
511 comprising 200 of the 226 ‘protected’ (SMCA) polygon records, 1,697 of the 1,799 ‘embayment’ polygon  
512 records, and 11,799 of the 11,900 ‘unprotected’ polygon records (Figure 1; Table S2; 13925 records  
513 total). Within the GBIF records, we found 689 species were inventoried with iNaturalist, and 140 species  
514 were inventoried by other sources. iNaturalist taxa were mostly members of the kingdom Animalia  
515 (78%), but also included Chromista (22%), Fungi (1%), and Plantae (17%). The taxonomic lineages  
516 identified in GBIF records totaled 598 Animalia, 23 Chromista, 7 Fungi, 147 Plantae, and a single  
517 Protozoan, identified as Mycosphaerellaceae (Choanozoa), that was contributed as a natural history

518 museum collection (Tables S2; Figure 1F). Overall, these results highlight the strength of GBIF data to  
519 track the animal kingdom ([GBIF Sources](#)).

520  
521 We compared fish in the eDNA *12S* and GBIF results because *12S* targeted vertebrates. The *12S*  
522 sequencing results produced a small list, but showed complementarity with GBIF. eDNA *12S* results  
523 contained 43 taxa, of which 33 were Teleostei and the remainder were other vertebrates (leopard shark,  
524 sea otter, sea lion). Of the fish, 23 were resolved to species, with the remainder resolved to genus or  
525 family (Table S7). Silversides (Atherinopsidae) were identified in eDNA but sequences were matched to  
526 a genus not known in California, *Odontesthes*. We checked the *12S* reference DNA database, and  
527 noticed it only contained four Atherinopsidae genera, and the California grunion genus *Leuresthes* was  
528 missing. As of the date of submission of this manuscript, a *12S* sequence for this genus has yet to be  
529 published in NCBI (April 2019). The grunion genera recorded in GBIF were all missing from the reference  
530 eDNA database, suggesting that gaps in sequencing cause erroneous identification, but GBIF information  
531 helped elucidate this problem. In a few cases, eDNA could only identify a taxon to genus, such as  
532 *Xiphister*, but of the 71 fish species recorded from Pillar Point in GBIF, there was only a single species in  
533 this genus inventoried, the black prickleback *Xiphister atropurpureus*, providing a candidate source  
534 species for the DNA signal. Of the species-level eDNA identifications, twelve species were in GBIF with  
535 observations from within the Pillar Point area polygons, and eleven species were in GBIF and observed  
536 in California but not observed at Pillar Point (Table S14), suggesting that because intertidal observations  
537 are limited to low tides and sight range, GBIF fish observations may represent a more narrow  
538 spatiotemporal window than eDNA, and eDNA may fill in gaps of which species visit the reef at periods  
539 of inundation.

540

541 The most common GBIF observations were families Polyceridae (Mollusca) for Animalia, Laminariaceae  
542 (Ochrophyta) for Chromista, Ramalinaceae (Ascomycota) for Fungi, Asteraceae (Thacheophyta) for  
543 Plantae. These were not the same as the most frequently observed taxa in eDNA results in those  
544 kingdoms: Campanulariidae (Cnidaria) for Animalia, Thraustochytriaceae (Pseudofungi) for Chromista,  
545 Glomeraceae (Glomeromycota) for Fungi, and Gigartinaceae (Rhodophyta) for Plantae. These  
546 differences in dominant taxa suggest eDNA and GBIF are very different lenses to explore biodiversity.  
547 We note that for both datasets, most commonly observed does not equal most common: for  
548 photographs, it means more photographs of these taxa have been shared, and for eDNA, it means more  
549 samples had DNA from those taxa, and release of DNA into the environment may vary among taxa. The  
550 [Common Taxa](#) tab shows which taxa are shared between datasets. We were surprised that the  
551 Campanulariidae were never identified in GBIF data from the bay, despite their frequency in iNaturalist  
552 observations in other parts of California (GBIF.org; not shown). GBIF records did show observations for a  
553 taxon in the same order (Leptothecata), but were all for *Aglaophenia latirostris*. This gap in observations  
554 suggests there is capacity to observe broader biodiversity with more overlap with eDNA, but this may  
555 require restructuring survey events to generate interest and capacity to notice species.  
556  
557 GBIF and eDNA analyses detected different aspects of biodiversity, with eDNA detecting 82 phyla and  
558 GBIF detecting 19 phyla (Figure 1D). The [Taxonomy Comparison](#) tab allows users to explore the extent of  
559 common taxa at the different phylogenetic levels using Venn diagrams (Figure 1E; Figure S6). With  
560 increased taxonomic resolution, the concordance between eDNA and GBIF is diminished (Figure 1D).  
561 The family level provided the greatest overlap. Only 48 species-level assignments were common to both  
562 eDNA and GBIF. Nonetheless, much could be learned from overlapping taxa (see below).  
563

564 For example, by comparing frequencies of observation and using the GBIF website (GBIF.org), we were  
565 able to develop hypotheses for why the Bay Ghost Shrimp (genus *Neotrypaea*) was observed more by  
566 photographs than with eDNA (Figure 1C). Specifically, we hypothesized that the Bay Ghost Shrimp was  
567 more populous or widespread at other times of the year when we did not sample for eDNA (i.e. outside  
568 of February and April 2017). GBIF records showed the bulk of observations are in May (n=1701) and June  
569 (n=918) while fewer than 25 observations were in each of the other calendar months (Figure S7). This  
570 suggests that it may be possible that the early year collections of our eDNA sampling was why we did  
571 not observe widespread signals. The shrimp may move to deeper sediments in the winter, or recruit  
572 each year. We also observed the inverse pattern for the Star Barnacles (family Chthamalidae; Figure 1C).  
573 We detected eDNA signals in all zones, but GBIF data only showed them in the unprotected tidepool  
574 zone This may be simply explained by limitations to photograph the adults in the rocky sublittoral zone,  
575 or alternatively, that during their larval dispersal phase their planktonic microscopic cyprid larvae are  
576 wide spread but are impossible to see in the absence of a plankton tow. Barnacles may also be so  
577 common that they are not charismatic to photograph, and this is evidence of human preference. We  
578 note that barnacles were not species intentionally surveyed by the volunteers coordinated by CAS.

579

### 580 *3.8. eDNA fills a gap in GBIF-based biodiversity surveys*

581 GBIF data were too sparse in the SMCA to fairly assess alpha and beta diversity (e.g. Figure 1E). Based on  
582 eDNA, we expected that the taxon richness should at least mirror the unprotected polygon. The [Area](#)  
583 [Diversity](#) Table form shows only 103 unique taxa were in the protected SMCA according to GBIF,  
584 compared to 520 in the adjacent unprotected tidepools, which is where iNaturalist CAS citizen science  
585 activities were concentrated. In contrast, eDNA results limited to the main kingdoms inventoried in GBIF  
586 (Animalia, Chromista, and Plantae) had similar taxon richness for adjacent regions: 1210 taxa in the  
587 SMCA and 1546 in the unprotected tidepools (see *Area Diversity* tab).



588

589 We then ask if eDNA may help link compositionally similar sites, and chose to examine sites that  
590 clustered within the SMCA samples in eDNA beta diversity ordination plots (Figure 2; Figure S8). The site  
591 that consistently clustered tightly and with SMCA samples regardless of marker was PP184-B1 (syn  
592 K0184-LB-S1; <https://data.ucedna.com/samples/792>). This single site had ~100 animal taxa, including  
593 cabezon, cormorant, mussels, and ostracods. While it was beyond our capacity to follow replicate GBIF  
594 work in the SMCA site and test if these sites are similar using other biodiversity metrics, we propose  
595 multi-locus compositional similarity as an eDNA approach to find accessible 'surrogate sites' for difficult  
596 to access areas.

597

### 598 *3.9. GBIF taxa and eDNA have numerous singletons*

599 Diminishing overlap with higher taxonomic resolution may be partially explained by misidentifications or  
600 rare taxa. Misidentifications can be due to misdiagnosed traits (morphological or DNA sequence). For  
601 both eDNA and GBIF, we plotted site frequencies for taxa found, and found datasets were similar across  
602 the classification levels for Animalia, the only kingdom with sufficient GBIF data to be fairly comparable  
603 (Figure 2). In the eDNA data, 322/742 of species-level taxa were found in only one of the 88 sites (43%  
604 singleton species). For GBIF data, 148/566 of species observations were single occurrences (26%  
605 singleton species). Although eDNA has significantly more singletons (z-test, z-score -3.6195;  $p =$   
606 0.00015), singletons occur in over a quarter of species-level inventories in the GBIF dataset. This is a  
607 substantial proportion that may indicate the same resolution limitations as eDNA. For example,  
608 reference databases may be incomplete for both eDNA and GBIF datasets. We also found the large  
609 proportion of singletons in the eDNA results were only apparent for Animalia, Chromista, and Plantae,  
610 suggesting that in other kingdoms, the eDNA classification bias is not as large. The online [Taxonomic](#)  
611 [Frequency](#) tab gives users the capacity to study which taxa are rare or common in results.

612

613 *3.10. eDNA detects lower trophic levels than photographic observations*

614 We used the GloBI database to explore biotic of interactions of families detected by GBIF and eDNA  
615 observations (Table S13). We compared enrichment in a non-directional GloBI category, 'interacts\_with',  
616 which served as a control, to a directional category, 'eats', which served as the test variable. Chi-Square  
617 tests (Table 2) showed the eDNA results contained significantly more taxa that are eaten ( $X^2 =$   
618  $139.72$ ,  $df = 1$ ,  $p\text{-value} < 2.2e-16$ ) suggesting that eDNA detects lower trophic levels. No differences were  
619 found between eDNA and GBIF results for the "interacts\_with" term ( $p\text{-value} > 0.8$ ).

620

621 **Discussion**

622

623 We demonstrate that environmental DNA metabarcoding, an emergent citizen and community science  
624 tool, adds rich data on ecology that can also be used in biodiversity assessment. However, eDNA analysis  
625 is not likely to infer the same communities as human observation or biological collection surveys. eDNA  
626 studies such as ours are likely to capture lower trophic levels than photographic observations (Section  
627 3.10), and depending on the local environment, may capture different spatiotemporal scales (Section  
628 3.1). eDNA may reveal genetic diversity that is as yet unclassifiable and underexplored (Tables S4-S7),  
629 and may reveal many novel potential biotic interactions.

630

631 Environmental DNA multilocus metabarcoding can also potentially be used to rapidly characterize the  
632 spatiotemporal turnover of a system. However, as a recently developed tool, there are important  
633 considerations about sensitivity. Relying on eDNA-based estimates of local beta diversity to identify  
634 candidate priority conservation areas (da Silva et al., 2018), for instance, is subject to spurious high  
635 scores (Section 3.3). Biotic activities, such as growth, spawning, dispersal, burrowing, or recruitment,

636 may lead to misestimation of the spatial ranges of taxa (Section 3.7). Information sourced from GBIF,  
637 scientific literature, or taxonomists, along with sufficient DNA barcoding or genome sequencing, is  
638 needed to track misidentification in eDNA datasets (Section 3.4).

639  
640 The metabarcoding approach, which amplifies and sequences barcode loci from a mixed sample  
641 (Taberlet et al., 2012; 2018), seeks to match DNA reads to reference sequences from voucher specimens  
642 to receive a taxonomic assignment (see Cristescu, 2014 for discussion). DNA barcode reference  
643 databases still have large gaps across phylogenies (see Curd et al., 2019) that limit discovery of their true  
644 taxonomic membership. Moreover, many barcodes lack diagnostic sequence variants for lower  
645 taxonomic assignment (Wolfe et al., 1987). These insufficiencies remain despite decades of generating  
646 DNA barcodes (beginning in 1982; Nanney, 1982; CBOL et al., 2009), and the formation of consortia  
647 designating specific barcodes (Hebert et al., 2003; Hebert and Gregory, 2005; Yao et al., 2010; Schoch et  
648 al., 2012) that have given rise to millions of publicly available sequences (~6.7 millions sequences in the  
649 Barcode of Life Database (BOLD) as of January 11, 2019; boldsystems.org). As natural areas managers  
650 rely on species lists and concrete evidence for inventories, we need to close the data gaps while  
651 broadening our strategies for effective monitoring from the taxon to the system community where  
652 eDNA can be most valuable as tool for ecological research, monitoring and conservation.

653  
654 Raw observational data from GBIF provide a rich but patchy view of biodiversity in space and time,  
655 because observations are not made systematically and they are subject to human bias and the  
656 technology they use. We are limited by where people can go and by their observational choices and  
657 capacities to take photographs or make collections (Section 3.8). The CAS team is currently developing  
658 tools to manage these biases. Haphazard sampling for eDNA can have the same bias, but with little  
659 effort, systematic sampling events can be organized and executed by volunteers. Accurate identification

660 is also a potential challenge for iNaturalist as it is for eDNA. For photographic observations, machine  
661 learning algorithms assist the community in identifications, but the computer vision model is limited to  
662 10,000 species currently ([https://www.inaturalist.org/pages/computer\\_vision\\_demo](https://www.inaturalist.org/pages/computer_vision_demo)). Community  
663 experts affirm and revise these identifications, but over half of the species identified in iNaturalist have  
664 fewer than 20 total observations, as a result, there is little comparative data available to corroborate  
665 taxonomic assignments. We found elevated single occurrences of taxa in both eDNA and GBIF datasets,  
666 which may partially be explained by misidentification (Section 3.9; Figure 6). The addition of more data  
667 will be necessary to distinguish rare from misidentified species, as will integration of different kinds of  
668 biodiversity inventories in community platforms such as GBIF. Because of the accessibility of various  
669 data sources on the GBIF platform, we were able to show 11 fish species found with eDNA are first  
670 reports at the beach, as were 76 phyla that had no record in GBIF, which showcases eDNA as a feasible  
671 method to both fill inventory gaps and to include the more challenging branches of the tree of life  
672 (Ruppert et al., 2019).

673  
674 The pace of change in the science of environmental DNA sequencing and analysis is rapid, which makes  
675 the value of environmental sample collections all the more important. Curatorial resources such as the  
676 Global Genome Biodiversity Network, the NHMLA Diversity Initiative for the Southern California Ocean  
677 (DISCO), and the Genomic Observatories Metadatabase (GeOMe), are helping samples and their  
678 associated metadata remain accessible for future research. As techniques for sequencing and analyzing  
679 eDNA improve, we may soon readily track intraspecific change or genetic diversity that relates to  
680 ecological functions. Projects such as for the Earth BioGenome Project (Lewin et al., 2018) may also use  
681 environmental samples for species discovery critical to fill in the tree of life and enhance reference  
682 databases. Our brief investigation into Ostracoda genetic variants suggests surveying the unprotected  
683 tidepools of Pillar Point are the most likely to have uncataloged species (Appendix 2; Table S8). The

684 value of eDNA-based ecological community networks (Section 3.6; Figure S5), such as the candidate  
685 holobiomes (Figure 5) they reveal, may also increase as technology and theory improve.

686

687 The Pillar Point marsh and inner beach had been graded C-F in the most recent Heal the Bay report card  
688 (2016). While eDNA did show high density of harmful pathogens (Figure 4), we also find a complex,  
689 connected, and extremely diverse environment in both the marsh (highest alpha diversity; dense with  
690 complex life cycle parasites) and inner beach (highest LCBD). Our demonstration of eDNA to catalog the  
691 rich and dynamic biodiversity of this beach provides exciting evidence that there are many ‘low hanging  
692 fruit’ findings pertinent to both management and to basic research in biodiversity that can be gleaned  
693 from a few days of fieldwork and <\$4000 USD in DNA library preparation and sequencing costs.

694

695 One of the major conservation questions arising from this case study unique about concerned defining  
696 and monitoring the unique characteristics of the SMCA. With eDNA, the SMCA was found to harbor high  
697 density of unmonitored groups such as urochordates (Ascidiacea; with known invasive species), marine  
698 flatworms (Polycladida), and a unique assemblage of microbial eukaryotes. However, a dearth of  
699 photographic data contributions meant many priority taxa were not tracked. Although enhancing the  
700 observational data for the SMCA may be possible, our results at least provide a framework for  
701 monitoring the system for perturbation without relying on human observation. We suggest that by using  
702 surrogate sites identified by low eDNA beta diversity (Section 3.8), responses to environmental stress or  
703 change can be measured in heavily surveyed sites, and these can be used to predict the processes  
704 occurring in the SMCA.

705

706 The CALeDNA Program is growing its online inventory of California’s biodiversity and participants in the  
707 program are encouraged to pair their eDNA sampling with iNaturalist observations. Future directions

708 will include more case studies that compare both tools with additional biodiversity correlates such as  
709 those from remote sensing data. We will also work toward better understanding the significance of  
710 spatiotemporal trends. It is imperative that CALeDNA and various public and professional biomonitoring  
711 programs work together to cross-inform each other so we can make strategic efforts to promote healthy  
712 biodiversity.

### 713 **Data Availability**

714 All raw sequence data are available in the NCBI SRA under project *PENDING ACCEPTANCE*. Software  
715 necessary to repeat the analyses are available in DRYAD (<https://doi.org/10.5061/dryad.mf0126f>), which  
716 also contains DNA reference databases for *18S*, *12S*, and *16S* markers. The CO1-BOLD reference  
717 database is archived in Zenodo (*PENDING*). All other data needed to replicate the results are included in  
718 supplemental materials.

719

### 720 **References**

721

722 Allen, W. (2003). Plant blindness. *BioScience* 53, 926–926.

723

724 Amaral-Zettler, L.A., McCliment, E.A., Ducklow, H.W., and Huse, S.M. (2009). A method for studying  
725 protistan diversity using massively parallel sequencing of v9 hypervariable regions of small-subunit  
726 ribosomal RNA Genes. *PLOS ONE* doi:[10.1371/journal.pone.0006372](https://doi.org/10.1371/journal.pone.0006372).

727

728 Auld, S.K., and Tinsley, M.C. (2015). The evolutionary ecology of complex lifecycle parasites: linking  
729 phenomena with mechanisms. *Heredity* 114, 125–132.

730

731 Benjamini, Y., and Hochberg, Y. (1995). Controlling the false discovery rate: a practical and powerful  
732 approach to multiple testing. *Journal of the Royal Statistical Society Series B* 57, 289–300.  
733

734 Bird, T.J., Bates, A.E., Lefcheck, J.S., Hill, N.A., Thomson, R.J., Edgar, G.J., Stuart-Smith, R.D.,  
735 Wotherspoon, S., Krkosek, M., Stuart-Smith, J.F., et al. (2014). Statistical solutions for error and bias in  
736 global citizen science datasets. *Biological Conservation* 173, 144–154.  
737

738 Bradley, I.M., Pinto, A.J., and Guest, J.S. (2016). Design and Evaluation of Illumina MiSeq-Compatible,  
739 18S rRNA Gene-Specific primers for improved characterization of mixed phototrophic communities.  
740 *Applied Environmental Microbiology* 82, 5878–5891.  
741

742 Callahan, B.J., McMurdie, P.J., Rosen, M.J., Han, A.W., Johnson, A.J.A., and Holmes, S.P. (2016). DADA2:  
743 High-resolution sample inference from Illumina amplicon data. *Nature Methods* 13, 581–583.  
744

745 Caporaso, J.G., Lauber, C.L., Walters, W.A., Berg-Lyons, D., Huntley, J., Fierer, N., Owens, S.M., Betley, J.,  
746 Fraser, L., Bauer, M., et al. (2012). Ultra-high-throughput microbial community analysis on the Illumina  
747 HiSeq and MiSeq platforms. *The ISME Journal* 6, 1621–1624.  
748

749 CBOL Plant Working Group, Hollingsworth, P.M., Forrest, L.L. et al. (2009). A DNA barcode for land  
750 plants. *Proceedings of the National Academy of Sciences* 106,12794–12797.  
751 doi:[10.1073/pnas.0905845106](https://doi.org/10.1073/pnas.0905845106).  
752

753 Chase, J.M., Kraft, N.J.B., Smith, K.G., Vellend, M., and Inouye, B.D. (2011). Using null models to  
754 disentangle variation in community dissimilarity from variation in  $\alpha$ -diversity. *Ecosphere*.  
755 doi:[10.1890/ES10-00117.1](https://doi.org/10.1890/ES10-00117.1).  
756  
757 Cristescu, M.E. (2014). From barcoding single individuals to metabarcoding biological communities:  
758 towards an integrative approach to the study of global biodiversity. *Trends in Ecology and Evolution* 29,  
759 566–571.  
760  
761 Curd, E.E., Gold, Z., Kandlikar, G., Gomer, J., Ogden, M., O’Connell, T., Pipes, L., Schweizer, T., Rabichow,  
762 L., Lin, M., et al. (2019). Anacapa Toolkit: an environmental DNA toolkit for processing multilocus  
763 metabarcode datasets. *Methods in Ecology and Evolution*, accepted and in press. *BioRxiv*  
764 doi:[10.1101/488627](https://doi.org/10.1101/488627).  
765  
766 Csardi, G., Nepusz, T. (2006). The Igraph software package for complex network research. *InterJournal*  
767 *Complex Systems*, 1695.  
768  
769 da Silva, P.G., Hernández, M.I.M., and Heino, J. (2018). Disentangling the correlates of species and site  
770 contributions to beta diversity in dung beetle assemblages. *Diversity and Distributions* 24, 1674–1686.  
771  
772 Davis, N.M., Proctor, D.M., Holmes, S.P., Relman, D.A., and Callahan, B.J. (2018). Simple statistical  
773 identification and removal of contaminant sequences in marker-gene and metagenomics data.  
774 *Microbiome* 6, 226.  
775



776 Diaz, S., Settele, J., Brondizio, E. (2019). Summary for policymakers of the global assessment report on  
777 biodiversity and ecosystem services of the Intergovernmental Science-Policy Platform on Biodiversity  
778 and Ecosystem Services. Germany: Secretariat of the Intergovernmental SciencePolicy Platform on  
779 Biodiversity and Ecosystem Services. Available from  
780 [https://www.ipbes.net/sites/default/files/downloads/spm\\_unedited\\_advance\\_for\\_posting\\_htn.pdf](https://www.ipbes.net/sites/default/files/downloads/spm_unedited_advance_for_posting_htn.pdf)  
781

782 Dray, S., Blanchet, G., Borcard, D. et al. (2016). adespatial: Multivariate multiscale spatial analysis.  
783 Retrieved from <https://cran.r-project.org/web/packages/adespatial/index.html>.  
784

785 Dunn, O.J. (1964). Multiple comparisons using rank sums. *Technometrics* 6, 241–252.  
786

787 Folmer, O., Black, M., Hoeh, W., Lutz, R., and Vrijenhoek, R. (1994). DNA primers for amplification of  
788 mitochondrial cytochrome c oxidase subunit I from diverse metazoan invertebrates. *Mol Mar Biol*  
789 *Biotechnol* 3, 294–9.  
790

791 Fonseca, V.G., Carvalho, G.R., Sung, W., Johnson, H.F., Power, D.M., Neill, S.P., Packer, M., Blaxter, M.L.,  
792 Lamshead, P.J.D., Thomas, W.K., et al. (2010). Second-generation environmental sequencing unmask  
793 marine metazoan biodiversity. *Nature Communications*. doi:[10.1038/ncomms1095](https://doi.org/10.1038/ncomms1095).  
794

795 Gao, X., Lin, H., Revanna, K., and Dong, Q. (2017). A Bayesian taxonomic classification method for 16S  
796 rRNA gene sequences with improved species-level accuracy. *BMC Bioinformatics*. doi:[10.1186/s12859-](https://doi.org/10.1186/s12859-017-1670-4)  
797 [017-1670-4](https://doi.org/10.1186/s12859-017-1670-4).  
798

799 Groom, Q., Weatherdon, L., and Geijzendorffer, I.R. (2017). Is citizen science an open science in the case  
800 of biodiversity observations? *Journal of Applied Ecology* 54, 612–617.

801  
802 Guerrero, R., Margulis, L., and Berlanga, M. (2013). Symbiogenesis: the holobiont as a unit of evolution.  
803 *International Microbiology* 133–143.

804  
805 Hebert Paul D. N., Cywinska Alina, Ball Shelley L., and deWaard Jeremy R. (2003). Biological  
806 identifications through DNA barcodes. *Proceedings of the Royal Society of London. Series B: Biological*  
807 *Sciences* 270, 313–321.

808  
809 Hebert, P.D.N., and Gregory, T.R. (2005). The promise of DNA barcoding for taxonomy. *Systematic*  
810 *Biology* 54, 852–859.

811  
812 Hecker, S., Bonney, R., Haklay, M., Hölker, F., Hofer, H., Goebel, C., Gold, M., Makuch, Z., Ponti, M.,  
813 Richter, A., et al. (2018). Innovation in Citizen Science – Perspectives on Science-Policy Advances. *Citizen*  
814 *Science: Theory and Practice* 3, 4.

815  
816 Hechinger, R.F., and Lafferty, K.D. (2005). Host diversity begets parasite diversity: bird final hosts and  
817 trematodes in snail intermediate hosts. *Proceedings of the Royal Society B: Biological Sciences* 272,  
818 1059–1066.

819  
820 Herlemann, D.P.R., Lundin, D., Labrenz, M., Jürgens, K., Zheng, Z., Aspeborg, H., and Andersson, A.F.  
821 (2013). Metagenomic de novo assembly of an aquatic representative of the Verrucomicrobial class  
822 Spartobacteria. *MBio* 4, e00569-12.

823

824 Hollander, M., Wolfe, D.A., and Chicken, E. (2013). Nonparametric Statistical Methods USA: John Wiley  
825 and Sons, Inc.

826

827 Hupało, K., Mamos, T., Wrzesińska, W., and Grabowski, M. (2018). First endemic freshwater *Gammarus*  
828 from Crete and its evolutionary history—an integrative taxonomy approach. PeerJ 6.

829

830 Kandlikar, G.S., Gold, Z.J., Cowen, M.C., Meyer, R.S., Freise, A.C., Kraft, N.J.B., Moberg-Parker, J.,  
831 Sprague, J., Kushner, D.J., and Curd, E.E. (2018). ranacapa: An R package and Shiny web app to explore  
832 environmental DNA data with exploratory statistics and interactive visualizations. F1000Research.  
833 doi:[10.12688/f1000research.16680.1](https://doi.org/10.12688/f1000research.16680.1).

834

835 Keeley, J. E., and P. H. Zedler. (1998). Characterization and global distribution of vernal pools. Pages 1–  
836 14 in C. W. Witham, E. T. Bauder, D. Belk, W. R. Ferren Jr., and R. Ornduff, editors. Ecology, conservation  
837 and management of vernal pool ecosystems—Proceedings from a 1996 conference. California Native  
838 Plant Society, Sacramento.

839

840 Kurtz, Z.D., Müller, C.L., Miraldi, E.R., Littman, D.R., Blaser, M.J., and Bonneau, R.A. (2015). Sparse and  
841 compositionally robust inference of microbial ecological networks. PLOS Computational Biology.  
842 doi:[10.1371/journal.pcbi.1004226](https://doi.org/10.1371/journal.pcbi.1004226).

843

844 Langmead, B., and Salzberg, S.L. (2012). Fast gapped-read alignment with Bowtie 2. Nature Methods 9,  
845 357–359.

846

847 Legendre, P., and Cáceres, M.D. (2013). Beta diversity as the variance of community data: dissimilarity  
848 coefficients and partitioning. *Ecology Letters* 16, 951–963.  
849

850 León-Palmero, E., Joglar, V., Álvarez, P.A., Martín-Platero, A., Llamas, I., and Reche, I. (2018). Diversity  
851 and antimicrobial potential in sea anemone and holothurian microbiomes. *PLOS*.  
852 doi:[10.1371/journal.pone.0196178](https://doi.org/10.1371/journal.pone.0196178).  
853

854 Leray, M., Yang, J.Y., Meyer, C.P., Mills, S.C., Agudelo, N., Ranwez, V., Boehm, J.T., and Machida, R.J.  
855 (2013). A new versatile primer set targeting a short fragment of the mitochondrial COI region for  
856 metabarcoding metazoan diversity: application for characterizing coral reef fish gut contents. *Frontiers*  
857 *in Zoology*. doi:[10.1186/1742-9994-10-34](https://doi.org/10.1186/1742-9994-10-34).  
858

859 Lewin, H.A., Robinson, G.E., Kress, W.J., Baker, W.J., Coddington, J., Crandall, K.A., Durbin, R., Edwards,  
860 S.V., Forest, F., Gilbert, M.T.P., et al. (2018). Earth BioGenome Project: Sequencing life for the future of  
861 life. *PNAS* 115, 4325–4333.  
862

863 Martin, M. (2011). Cutadapt removes adapter sequences from high-throughput sequencing reads.  
864 *EMBnet.Journal* 17, 10–12.  
865

866 McMurdie, P.J., and Holmes, S. (2013). phyloseq: An R package for reproducible interactive analysis and  
867 graphics of microbiome census data. *PLOS ONE*. doi:[10.1371/journal.pone.0061217](https://doi.org/10.1371/journal.pone.0061217).  
868

869 Meyer, R.S., Curd, E.E., Schweizer, T., Gold, Z., Ruiz Ramos, D., Shirazi, S., Kandlikar, G., Kwan, W.-Y., Lin,  
870 M., Friese, A., et al. (2019). The California environmental DNA “CALeDNA” program. BioRxiv.  
871 doi:[10.1101/503383](https://doi.org/10.1101/503383).

872  
873 Meyer, R., and Drill, S. (2019). Community and citizen science at the UC Division of Agriculture and  
874 Natural Resources. Final Report, Center for Community and Citizen Science.  
875 [https://education.ucdavis.edu/sites/main/files/citizen\\_and\\_community\\_science\\_at\\_anr\\_final\\_report.pdf](https://education.ucdavis.edu/sites/main/files/citizen_and_community_science_at_anr_final_report.pdf)  
876 [f](#)

877  
878 Miya, M., Sato, Y., Fukunaga, T., Sado, T., Poulsen, J.Y., Sato, K., Minamoto, T., Yamamoto, S., Yamanaka,  
879 H., Araki, H., et al. (2015). MiFish, a set of universal PCR primers for metabarcoding environmental DNA  
880 from fishes: detection of more than 230 subtropical marine species. Royal Society Open Science.  
881 doi:[10.1098/rsos.150088](https://doi.org/10.1098/rsos.150088).

882  
883 Muller, E.M., Fine, M., and Ritchie, K.B. (2016). The stable microbiome of inter and sub-tidal anemone  
884 species under increasing pCO<sub>2</sub>. Scientific Reports 6, 37387. doi:[10.1038/srep37387](https://doi.org/10.1038/srep37387).

885  
886 Nanney, D.L. (1982). Genes and phenes in Tetrahymena. BioScience 32, 783–788.

887  
888 National Research Council. (2001). Grand challenges in environmental sciences. National Research  
889 Council. doi: 10.17226/9975

890  
891 O’Donnell, J.L., Kelly, R.P., Shelton, A.O., Samhour, J.F., Lowell, N.C., and Williams, G.D. (2017). Spatial  
892 distribution of environmental DNA in a nearshore marine habitat. PeerJ. doi:[10.7717/peerj.3044](https://doi.org/10.7717/peerj.3044).

893

894 Oksanen, J., Blanchet, F., Kindt, R. (2015). Community ecology package ‘vegan’. Retrieved from [https://](https://github.com/vegandevs/vegan)

895 [github.com/vegandevs/vegan](https://github.com/vegandevs/vegan).

896

897 Patterson, D., Mozzherin, D., Shorthouse, D., and Thessen, A. (2016). Challenges with using names to link

898 digital biodiversity information. *Biodiversity Data Journal* 4. doi:[10.3897/BDJ.4.e8080](https://doi.org/10.3897/BDJ.4.e8080).

899

900 Peters, M.K., Hemp, A., Appelhans, T., Becker, J.N., Behler, C., Classen, A., et al. (2019). Climate–land-use

901 interactions shape tropical mountain biodiversity and ecosystem functions. *Nature* 568, 88–92.

902

903 Poelen, J.H., Simons, J.D., and Mungall, C.J. (2014). Global biotic interactions: An open infrastructure to

904 share and analyze species-interaction datasets. *Ecological Informatics* 24, 148–159.

905

906 Raup, D.M., and Crick, R.E. (1979). Measurement of faunal similarity in paleontology. *Journal of*

907 *Paleontology* 53, 1213–1227.

908

909 Robertson, T., Döring, M., Guralnick, R., Bloom, D., Wieczorek, J., Braak, K., Otegui, J., Russell, L., and

910 Desmet, P. (2014). The GBIF integrated publishing toolkit: facilitating the efficient publishing of

911 biodiversity data on the internet. *PLOS ONE*. doi:[10.1371/journal.pone.0102623](https://doi.org/10.1371/journal.pone.0102623).

912

913 Ruggiero, M.A., Gordon, D.P., Orrell, T.M., Bailly, N., Bourgoin, T., Brusca, R.C., Cavalier-Smith, T., Guiry,

914 M.D., and Kirk, P.M. (2015). A higher level classification of all living organisms. *PLOS ONE* 10.

915 doi:[10.1371/journal.pone.0119248](https://doi.org/10.1371/journal.pone.0119248).

916

917 Ruppert, K.M., Kline, R.J., and Rahman, M.S. (2019). Past, present, and future perspectives of  
918 environmental DNA (eDNA) metabarcoding: A systematic review in methods, monitoring, and  
919 applications of global eDNA. *Global Ecology and Conservation* 17, e00547.  
920  
921 Schoch, C.L., Seifert, K.A., Huhndorf, S., Robert, V., Spouge, J.L., Levesque, C.A., Chen, W., and  
922 Consortium, F.B. (2012). Nuclear ribosomal internal transcribed spacer (ITS) region as a universal DNA  
923 barcode marker for Fungi. *PNAS* 109, 6241–6246.  
924  
925 Taberlet, P., Bonin, A., Zinger, L., and Coissac, E. (2018). *Environmental DNA: For Biodiversity Research*  
926 *and Monitoring*. United Kingdom: Oxford University Press.  
927  
928 Taberlet P, Coissac E, Pompanon F et al. 2012. Towards next-generation biodiversity assessment using  
929 DNA metabarcoding. *Molecular Ecology*, 21:2045–2050. doi:[10.1111/j.1365-294X.2012.05470.x](https://doi.org/10.1111/j.1365-294X.2012.05470.x).  
930  
931 Tipton, L., Müller, C.L., Kurtz, Z.D., Huang, L., Kleerup, E., Morris, A., Bonneau, R., and Ghedin, E. (2018).  
932 Fungi stabilize connectivity in the lung and skin microbial ecosystems. *Microbiome*. doi:[10.1186/s40168-](https://doi.org/10.1186/s40168-017-0393-0)  
933 [017-0393-0](https://doi.org/10.1186/s40168-017-0393-0).  
934  
935 Weber, L., DeForce, E., and Apprill, A. (2017). Optimization of DNA extraction for advancing coral  
936 microbiota investigations. *Microbiome*. doi:[10.1186/s40168-017-0229-y](https://doi.org/10.1186/s40168-017-0229-y).  
937  
938 Whittaker, R.H. (1972). Evolution and measurement of species diversity. *Taxon* 21, 213–251.  
939  
940 Wickham, H. (2009) *ggplot2: elegant graphics for data analysis*. USA: Springer.

941

942 Wolfe, K.H., Li, W.H., and Sharp, P.M. (1987). Rates of nucleotide substitution vary greatly among plant  
943 mitochondrial, chloroplast, and nuclear DNAs. *Proceedings of the National Academy of Sciences* 84,  
944 9054–9058.

945

946 Yao, H., Song, J., Liu, C., Luo, K., Han, J., Li, Y., Pang, X., Xu, H., Zhu, Y., Xiao, P., et al. (2010). Use of ITS2  
947 region as the universal DNA barcode for plants and animals. *PLOS ONE*.  
948 doi:[10.1371/journal.pone.0013102](https://doi.org/10.1371/journal.pone.0013102).

949

950 Zinger, L., Taberlet, P., Schimann, H., Bonin, A., Boyer, F., Barba, M.D., Gaucher, P., Gielly, L.,  
951 Giguët-Covex, C., Iribar, A., et al. (2019a). Body size determines soil community assembly in a tropical  
952 forest. *Molecular Ecology* 28, 528–543.

953

954 Zinger, L., Bonin, A., Alsos, I.G., Bálint, M., Bik, H., Boyer, F., Chariton, A.A., Creer, S., Coissac, E., Deagle,  
955 B.E., et al. (2019b). DNA metabarcoding—Need for robust experimental designs to draw sound  
956 ecological conclusions. *Molecular Ecology* 28, 1857–1862.

957

## 958 **Legends for Figures, Supplementary Figures, Supplementary Tables**

959

960 **Figure 1.** A-C. Map of the Pillar Point beach with highlighted polygons designating embayment (orange),  
961 unprotected (blue), and protected (red) areas used to group sites. A. The 88 eDNA sites are color coded  
962 by zones. From top right, marsh runoff (blue), unprotected inner beach (grey), unprotected outer beach  
963 (green), unprotected tidepools (red), and protected outer beach (SMCA; pink). B. The 13,942 GBIF  
964 observations, color coded by kingdom, with Animalia (blue), Plantae (green), Fungi (pink), and Chromista



965 (red). C. Examples of website functions for taxa contained in both eDNA and GBIF datasets. eDNA sites  
966 where a taxon was found are drop pins and GBIF sites where a taxon was found are dots. Bay ghost  
967 shrimp are commonly photographed but eDNA only detected them once. Star barnacles were only  
968 rarely documented in the unprotected tidepools with photographs, but they are found all over the area  
969 by eDNA. D. The total number of unique taxonomic lineages in eDNA, GBIF, or in common. The common  
970 taxa are also included in the plotted totals of each separate database. E. Venn diagrams of overlapping  
971 and unique taxa found in eDNA and GBIF datasets for the total data (All), for the February 2017  
972 collection for eDNA and the month of all February GBIF observations made over all years for which data  
973 was available, and for the April 2017 eDNA collection and April GBIF observations made over all years  
974 data was available. Colors for polygons are consistent with A and scaled to the relative number of taxa  
975 out of the total taxa included in that particular diagram. F. Pie charts of the proportion of unique taxa  
976 inventoried by each method. Photo credits: Monterey Bay Aquarium and Wild Kratts Wiki.

977  
978 **Figure 2.** Jaccard distance principal coordinate analysis of eDNA results from the markers *16S*, *CO1*, and  
979 *18S*, color coded by zone. Results show seasonal change along Axis 1 in *18S* and *16S*, and similar  
980 clustering of zones across all three markers.

981  
982 **Figure 3.** Relative abundance barplots coloring the most frequently observed 21 species. Grey bars  
983 represent the sums of all other taxa. Feb versus April indicate February and April 2017 collection dates.  
984 LCBD = Local Contributions to Beta Diversity. MHT = Mean High Tide line, Low or High indicate whether  
985 the collection was made below or above the MHT.

986 **Figure 4.** Heatmap of the eDNA-based taxonomic density within classes found in each zone, normalized  
987 to the total number of sites observed in each zone. Darker shades indicate higher density. Letters  
988 indicate significantly different groupings based on the Dunn post-hoc test, where cells with the same

989 letter are not significantly different from each other, based on corrected p-values. Only classes with  
990 significant differences from Kruskal-Wallis test results were plotted. We note Crinoidea were removed  
991 because sequences could not be affirmatively identified to be from the class.

992

993 **Figure 5.** Example network of Actiniidae from the 18S and 16S joint co-occurrence network (background)  
994 generated with multiSpiecEasi. a = link previously reported in Muller et al. (2018) and GloBI. b = link  
995 previously reported in Weber et al. (2017).

996

997 **Figure 6**  $\log_{10}$  transformed plot of taxon frequency observed in eDNA or GBIF datasets. All taxa were  
998 used if they had been classified minimally to the classification level designated (y-axis). The x-axis is the  
999 number of sites where a taxon was observed. Most observations in GBIF are Animalia. Single  
1000 observations are high for both eDNA and GBIF at the levels of families through species, most  
1001 pronounced in Animalia.

1002

1003 **Figure S1.** Taxon accumulation curves as increasing reads are retained in rarified datasets. Curves were  
1004 used to choose rarefaction settings.

1005

1006 **Figure S2.** Alpha diversity plots calculated using species richness, Simpson's index, and the Shannon  
1007 index ( $H'$ ) in a. Only Shannon index is shown in b.

1008

1009 **Figure S3.** Relative abundance barplots coloring the top 21 species. Grouping definitions are in Table S1  
1010 and Figure S2.

1011

1012 **Figure S4.** Plots to interpret skewness of LCBD scores if holobiomes of DNA swamping taxa are left in or  
1013 removed from *18S* results. The dependent variables are binary for either swamping or significantly  
1014 different LCBD scores from the rest of their groups. The dependent variables are different  
1015 representations of the LCBD score range. A. Plot showing the samples with significant LCBD P-values in  
1016 original results experienced either an increase in LCBD or a decrease in LCBD when holobiome-reduced  
1017 results were used to recalculate LCBD scores. B. Plot showing the majority of ‘swamped’ samples  
1018 experienced a reduction in LCBD when holobiome-reduced results were used to recalculate LCBD. C.  
1019 Plot showing the samples that were originally ‘swamped’ now fall into the distribution range of the bulk  
1020 of the samples in the holobiome-reduced LCBD results. D. Plot showing the samples that were originally  
1021 ‘swamped’ were distributed above the LCBD of the bulk of the samples in the original LCBD results.  
1022 Comparing plots D and C demonstrates reduction of the candidate holobiomes of high abundance taxa  
1023 helped the samples that experienced swamping look typical.

1024  
1025 **Figure S5.** SpieciEasi network analysis results of families detected by eDNA. Top left is a density plot of  
1026 the number of degrees taxa have in each network type. SpieciEasi networks are shown with numbers  
1027 corresponding to a family with the key in Table S12. Interactive figures of the networks are available on  
1028 the Pillar Point website.

1029  
1030 **Figure S6.** Degree of overlapping taxa among polygons. Circle sizes are scaled to the number of taxa.

1031  
1032 **Figure S7.** Excerpt from the GBIF website of observation frequency over months of the year.

1033  
1034 **Figure S8.** Ordination plots as in Figure 2 but with sample names as labels. PP184-B1 is the unprotected  
1035 tidepool sample that is closest to the SMCA samples in both *16S* and *18S* datasets.

1036

1037 **Table 1.** Features of the project website, [https://data.ucedna.com/research\\_projects/pillar-point](https://data.ucedna.com/research_projects/pillar-point)

| Website Tab                  | Function                                                                                                                                                        |
|------------------------------|-----------------------------------------------------------------------------------------------------------------------------------------------------------------|
| <b>Intro</b>                 | Introduces the CALeDNA and GBIF data, and shows the location of the data points on a map of Pillar Point                                                        |
| <b>Occurrence Comparison</b> | Shows the distribution of total presence counts of a taxon in eDNA results or in GBIF observations.                                                             |
| <b>GBIF Sources</b>          | Depicts data distribution from iNaturalist vs other contributions                                                                                               |
| <b>GBIF Taxonomy</b>         | Shows the GBIF taxa, whether they are in the NCBI database, and whether they have an eDNA result that matches                                                   |
| <b>Common Taxa</b>           | Lists taxa at each classification level that overlap, showing datapoints on the Pillar Point map                                                                |
| <b>Area Diversity</b>        | Presents filterable comparisons of unique and common taxa found among the three polygons for eDNA and GBIF dataset                                              |
| <b>Taxonomy Comparison</b>   | Displays Venn diagrams of filterable unique and common taxa between eDNA and GBIF results                                                                       |
| <b>Detection Frequency</b>   | Presents a filterable sorted list of frequency of occurrences for all taxa in a classification level                                                            |
| <b>Networks</b>              | Displays interactive co-occurrence networks at the family level                                                                                                 |
| <b>Biotic Interactions</b>   | Presents species frequently observed at Pillar Point with iNaturalist, the known biotic interactions and whether interacting taxa were in GBIF or eDNA datasets |

1038

1039

1040 **Table 2.** Number of observations of taxa within GBIF and eDNA datasets included in the Global Biotic

1041 Interactions database, that were used in Chi-Square tests (see main text).

| Dataset       | Source Eats       | Target of Eats    | Source Interacts  | Target Interacts  |
|---------------|-------------------|-------------------|-------------------|-------------------|
| GBIF (n=375)  | 5368 (179 unique) | 4690 (262 unique) | 3906 (223 unique) | 4102 (245 unique) |
| eDNA (n=1371) | 5030 (294 unique) | 6091 (444 unique) | 4523 (381 unique) | 4514 (442 unique) |

1042

1043 **Table S1.** eDNA sample metadata

1044

1045 **Table S2.** GBIF data for the three polygons

1046

1047 **Table S3.** Comparison of CO1 settings

1048

1049 **Table S4.** eDNA decontaminated results for *16S* marker

1050

1051 **Table S5.** eDNA decontaminated results for the *18S* marker

1052

1053 **Table S6.** Raw Anacapa output from MiSeq runs and eDNA decontaminated results for the *CO1* marker

1054

1055 **Table S7.** eDNA decontaminated results for the *12S* marker

1056

1057 **Table S8.** Genetic diversity analysis of eDNA results for Ostracods

1058

1059 **Table S9.** ANOSIM results from Raup and Jaccard beta diversity analyses

1060

1061 **Table S10.** Local Contribution to Beta Diversity scores

1062

1063 **Table S11.** Density enrichment test results and statistics

1064

1065 **Table S12.** Family co-occurrence networks

1066

1067 **Table S13.** Global Biotic Interactions data and results

1068

1069

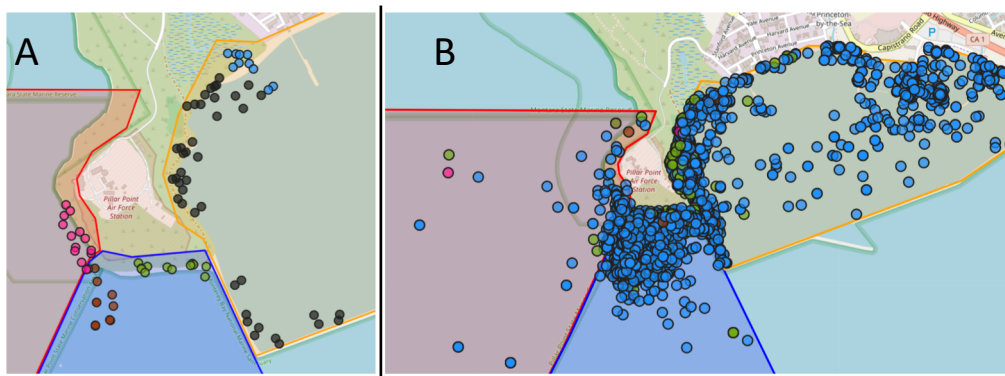

**C** Genus *Neotrypaea*: Bay Ghost Shrimp

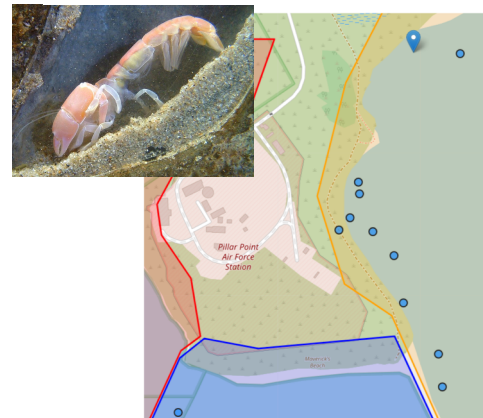

**D** Taxa reported at Pillar Point by eDNA and GBIF data

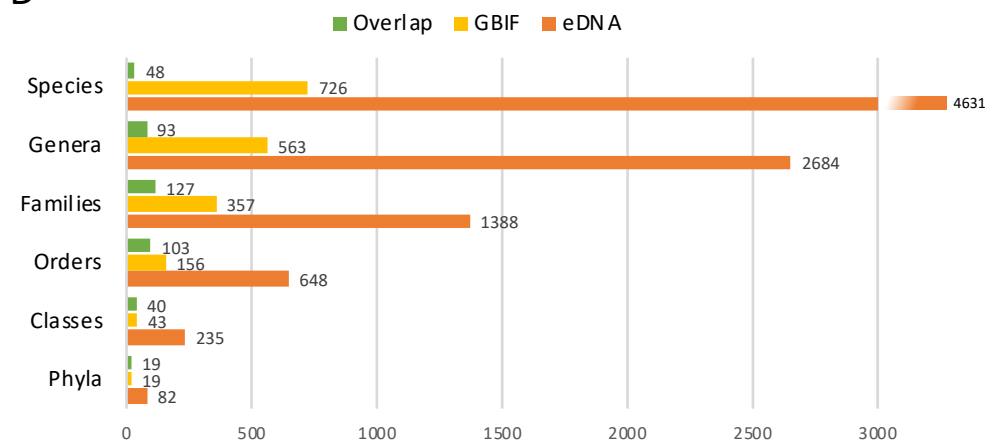

Family Chthamalidae: Star Barnacles

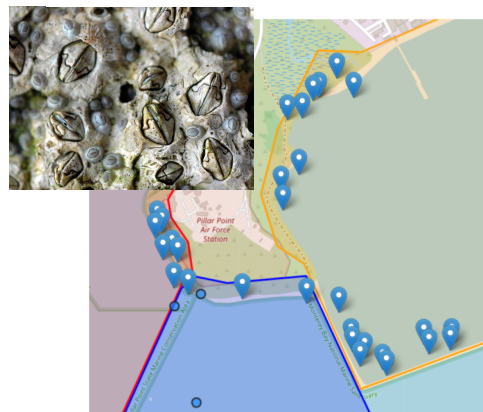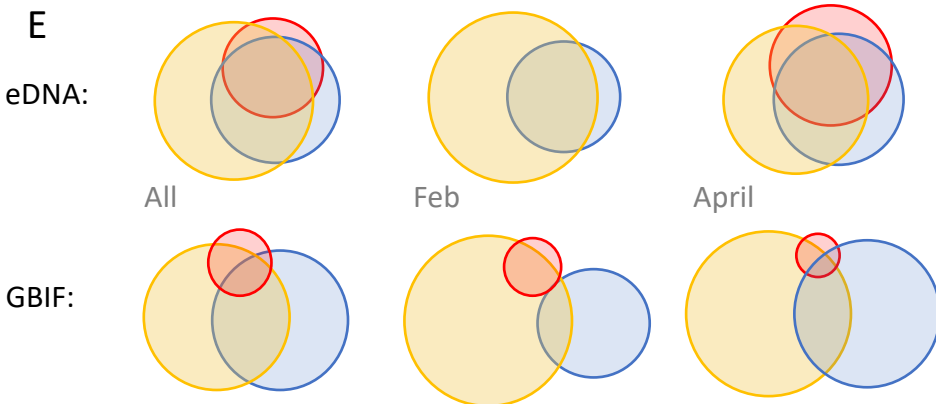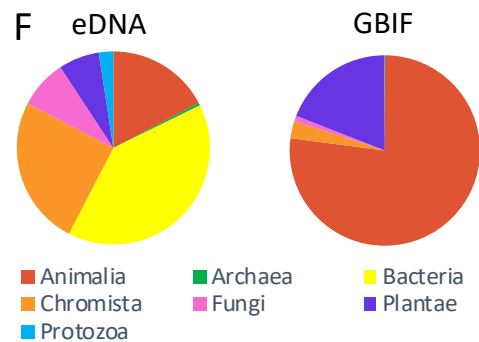

# 18S

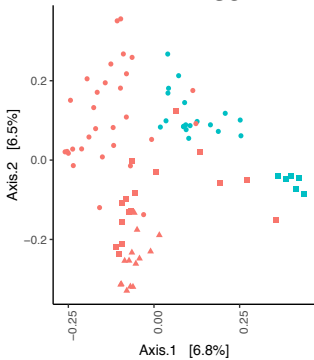

# CO1

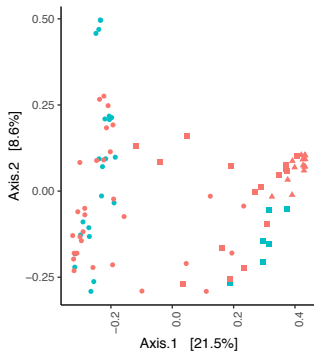

# 16S

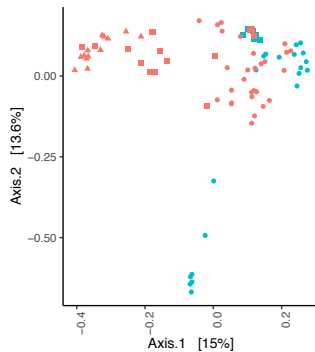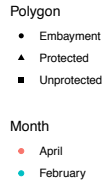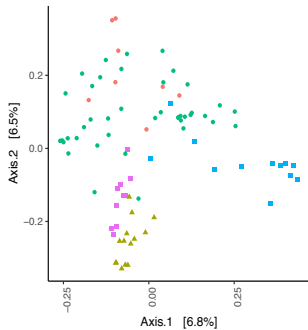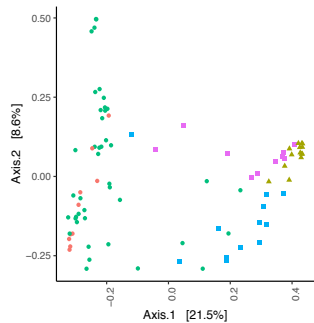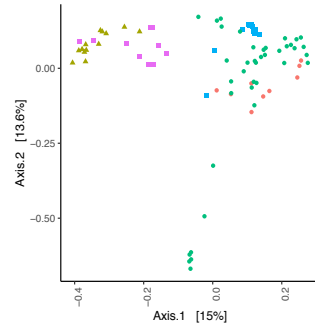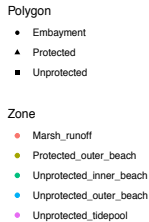

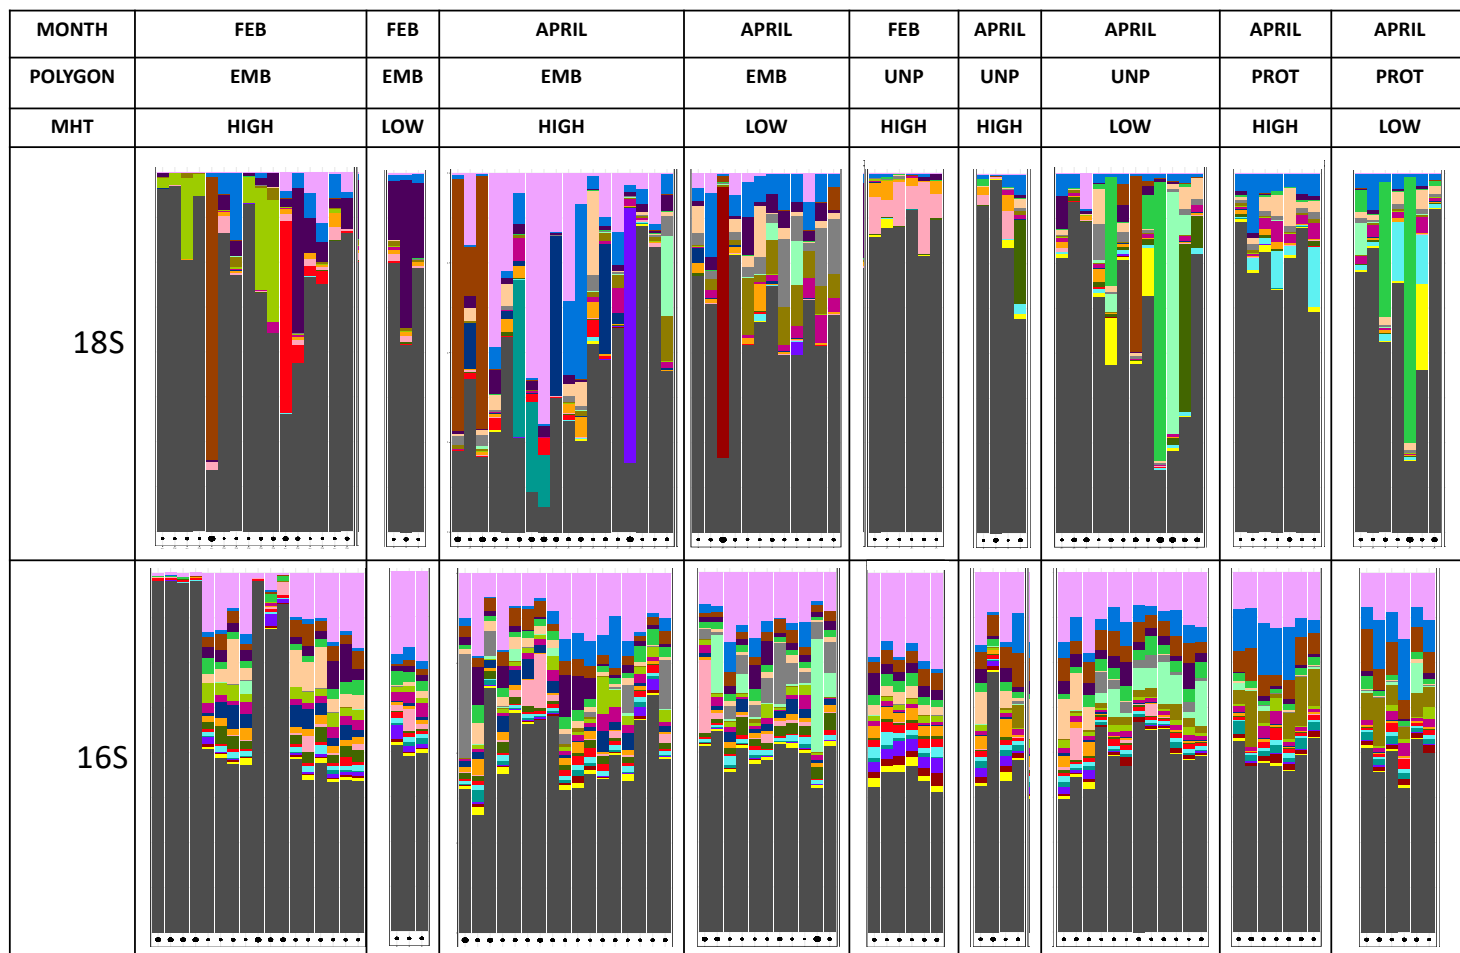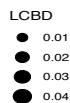

18S

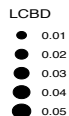

16S

Taxa

- Eukaryota.Miozoa.Dinophyceae.Gymnodiniales.Gymnodiniaceae.Amphidinium.Amphidinium.corpulentum
- Eukaryota.Ochrophyta.Bacillariophyceae.Naviculales.Naviculaceae.Navicula.
- Eukaryota.Nematoda.Enoplea.Enoplida.Oncholaimidae.Pontonema.Pontonema.vulgare
- Eukaryota.Ochrophyta.Bacillariophyceae.Bacillariales.Bacillariaceae..
- Eukaryota.Cnidaria.Anthozoa.Actiniaria.Actiniidae..
- Eukaryota.Bacillariophyta.Coscinodiscophyceae.Thalassiosirales.Thalassiosiraceae.Thalassiosira.
- Eukaryota.Bacillariophyta.Coscinodiscophyceae.Thalassiosirales.Thalassiosiraceae.Minidiscus.
- Eukaryota.Annelida.Polychaeta.Spionida.Spionidae.Rhynchospio.Rhynchospio.glutaea
- Eukaryota.Ochrophyta.Bacillariophyceae....
- Eukaryota.Cercozoa.Thecofilosea.Cryomonadida.Rhogostomidae.Rhogostoma.Rhogostoma.schuessleri
- Eukaryota.Ochrophyta.Bacillariophyceae.Naviculales....
- Eukaryota.Ciliophora.Phylopharyngea.Chlamydomonada.Chlamydomonadidae.Chlamydomonad.
- Eukaryota.Miozoa.Dinophyceae....
- Eukaryota.Cercozoa.Imbricatea.Euglyphida.Ovulinatidae.Ovulinata.Ovulinata.parva
- Eukaryota.Rhodophyta.Florideophyceae.Corallinales.Corallinaceae..
- Eukaryota.Miozoa.Dinophyceae.Gymnodiniales.Gymnodiniaceae..
- Eukaryota.Ochrophyta.Oomycetes.Lagenidiales.Lagenidiaceae.Lagenidium.Lagenidium.giganteum
- Eukaryota.Ciliophora.Nassophorea.Synhymenida.Orthodonellidae.Zosterodasys.Zosterodasys.agamalevi
- Eukaryota.Ciliophora.Nassophorea.Synhymenida.Orthodonellidae..
- Eukaryota.Platyhelminthes.Trematoda.Plagiorchiida.Monorchidae.Monorchis.
- Eukaryota.Rhodophyta.Florideophyceae.Palmariales.Palmariaceae.Palmaria.Palmaria.palmata
- Others

Taxa

- Bacteria.Proteobacteria.Gammaproteobacteria....
- Archaea.Thaumarchaeota.Nitrosopumilales.Nitrosopumilaceae.Nitrosopumilus.
- Bacteria.Bacteroidetes.Flavobacteriia.Flavobacteriales.Flavobacteriaceae..
- Bacteria.Bacteroidetes.Flavobacteriia.Flavobacteriales.Flavobacteriaceae.Maribacter.Maribacter.polysiphoniae
- Bacteria.Proteobacteria.Alphaproteobacteria.Rhodobacterales.Rhodobacteraceae..
- Bacteria.Bacteroidetes.Flavobacteriia.Flavobacteriales.Flavobacteriaceae..Flavobacteriaceae.bacterium.L.1.11
- Bacteria.Bacteroidetes.Flavobacteriia.Flavobacteriales.Flavobacteriaceae.Lutimonas.
- Bacteria.Proteobacteria.Gammaproteobacteria.Vibrionales.Vibrionaceae.Vibrio.
- Bacteria.Proteobacteria.Alphaproteobacteria.Rhodobacterales.Hyphomonadaceae..
- Bacteria.Proteobacteria.Gammaproteobacteria....gamma.proteobacterium.aik8
- Bacteria.Proteobacteria.Gammaproteobacteria....Olavius.algarvensis.Gamma.3.endosymbiont
- Bacteria.Proteobacteria.Deltaproteobacteria.Desulfobacterales.Desulfobulbaceae..
- Bacteria.Proteobacteria.Gammaproteobacteria.Thiotrichales.Thiotrichaceae.Cocleimonas.Cocleimonas.flava
- Eukaryota.Bacillariophyta.....
- Bacteria.Proteobacteria.Deltaproteobacteria....
- Bacteria.Planctomycetes.Planctomycetia.Planctomycetales.Planctomycetaceae..
- Bacteria.Proteobacteria.Gammaproteobacteria.Chromatiales...
- Bacteria.Bacteroidetes.Saprospiria.Saprospirales...
- Bacteria.Proteobacteria.Gammaproteobacteria.Chromatiales.Granulosicoccaceae.Granulosicoccus.
- Bacteria.Actinobacteria.Acidimicrobia....Acidimicrobiidae.bacterium.YM18.244
- Bacteria.Proteobacteria.Gammaproteobacteria.Thiotrichales.Thiotrichaceae..
- Others



## Class

Marsh runoff Protected outer beach Unprotected inner beach Unprotected outer beach Unprotected tidepool

| Class               | Marsh runoff | Protected outer beach | Unprotected inner beach | Unprotected outer beach | Unprotected tidepool |           |          |
|---------------------|--------------|-----------------------|-------------------------|-------------------------|----------------------|-----------|----------|
| Polycladidea        | ab           | a                     | b                       | ab                      | ab                   | Animalia  |          |
| Ascidacea           | a            | b                     | a                       | ab                      | ab                   |           |          |
| Appendicularia      | a            | b                     | a                       | ab                      | a                    |           |          |
| Polyplacophora      | a            | b                     | a                       | b                       | b                    |           |          |
| Mammalia            | a            | ab                    | a                       | b                       | a                    |           |          |
| Echinoidea          | ab           | c                     | a                       | ab                      | b                    |           |          |
| Trematoda           | a            | b                     | ab                      | ab                      | b                    |           |          |
| Anthozoa            | a            | b                     | b                       | b                       | b                    |           |          |
| Demospongiae        | a            | ab                    | ab                      | ab                      | b                    |           |          |
| Ostracoda           | ab           | ab                    | a                       | a                       | b                    |           |          |
| Neophora            | a            | ab                    | ab                      | b                       | b                    |           |          |
| Scyphozoa           | a            | ab                    | ab                      | b                       | b                    |           |          |
| Chromadorea         | a            | b                     | a                       | b                       | ab                   |           |          |
| Gastropoda          | a            | ab                    | b                       | ab                      | b                    |           |          |
| Thermoplasmata      | a            | b                     | a                       | ab                      | b                    | Archaea   |          |
| Nitrososphaeria     | ab           | a                     | b                       | ab                      | ab                   |           |          |
| Fusobacteria        | a            | b                     | a                       | ab                      | ab                   |           |          |
| Nitriliruptoria     | ab           | c                     | a                       | a                       | bc                   |           |          |
| Halobacteria        | a            | b                     | ab                      | ab                      | b                    |           |          |
| Ignavibacteria      | a            | b                     | a                       | a                       | a                    |           |          |
| Sphingobacteria     | a            | a                     | b                       | ab                      | a                    |           |          |
| Zeta proteobacteria | ab           | a                     | b                       | ab                      | a                    |           |          |
| Rhodothermia        | a            | ab                    | a                       | a                       | b                    |           |          |
| Bacilli             | a            | b                     | a                       | a                       | ab                   |           |          |
| Spirochaetia        | a            | b                     | a                       | ab                      | a                    |           |          |
| Bacteroidia         | ab           | a                     | b                       | ab                      | ab                   |           |          |
| Spartobacteria      | a            | a                     | b                       | a                       | a                    |           |          |
| Caldilineae         | ab           | a                     | b                       | ab                      | ab                   |           |          |
| Clostridia          | a            | b                     | a                       | ab                      | a                    |           |          |
| Calditrichae        | ab           | c                     | a                       | ab                      | bc                   |           |          |
| Deferribacteres     | ab           | cd                    | a                       | c                       | bd                   |           |          |
| Bicoecae            | a            | b                     | c                       | abc                     | bc                   | Chromista |          |
| Centrohelea         | a            | b                     | a                       | a                       | ab                   |           |          |
| Phaeophyceae        | a            | b                     | b                       | b                       | b                    |           |          |
| Polycystinea        | ab           | a                     | b                       | ab                      | b                    |           |          |
| Mediophyceae        | a            | a                     | a                       | b                       | a                    |           |          |
| Giobothalamea       | a            | a                     | a                       | b                       | a                    |           |          |
| Pavlovophyceae      | a            | b                     | b                       | b                       | b                    |           |          |
| Oligohymenophorea   | a            | ab                    | b                       | ab                      | ab                   |           |          |
| Perkinsea           | a            | b                     | a                       | a                       | a                    |           |          |
| Pelagophyceae       | ab           | a                     | b                       | a                       | a                    |           |          |
| Heterotrichae       | a            | b                     | a                       | ab                      | ab                   |           |          |
| Phyllopharyngea     | a            | a                     | a                       | b                       | a                    |           |          |
| Telonemea           | a            | b                     | a                       | ab                      | ab                   |           |          |
| Gregarinasina       | a            | b                     | bc                      | ac                      | b                    |           |          |
| Plagiopylea         | a            | b                     | ac                      | bc                      | a                    |           |          |
| Cryptophyceae       | a            | b                     | a                       | ab                      | b                    |           |          |
| Labyrinthulea       | a            | b                     | ac                      | abc                     | bc                   |           |          |
| Basidiobolomycetes  | ab           | a                     | b                       | a                       | a                    | Fungi     |          |
| Tremellomycetes     | a            | b                     | a                       | ab                      | a                    |           |          |
| Pyramimonadophyceae | a            | bc                    | b                       | ac                      | abc                  |           |          |
| Compsopogonophyceae | a            | b                     | a                       | a                       | b                    |           |          |
| Ulvophyceae         | a            | b                     | ab                      | b                       | b                    |           |          |
| Rhodellophyceae     | a            | b                     | a                       | b                       | b                    |           |          |
| Bangiophyceae       | a            | ab                    | b                       | a                       | b                    |           |          |
| Trebouxiophyceae    | a            | b                     | ab                      | b                       | ab                   |           |          |
| Zygnemophyceae      | ab           | ac                    | b                       | ac                      | c                    |           |          |
| Chlorodendrophyceae | a            | b                     | a                       | b                       | b                    |           |          |
| Lobosa              | a            | b                     | b                       | ab                      | b                    |           | Plantae  |
| Thecomonadea        | a            | ab                    | b                       | ab                      | ab                   |           |          |
| Choanoflagellata    | a            | b                     | b                       | ab                      | b                    |           |          |
| Ichthyosporea       | a            | b                     | b                       | a                       | b                    |           |          |
| Tubulinea           | a            | b                     | b                       | ab                      | ab                   |           |          |
|                     |              |                       |                         |                         |                      |           | Protozoa |

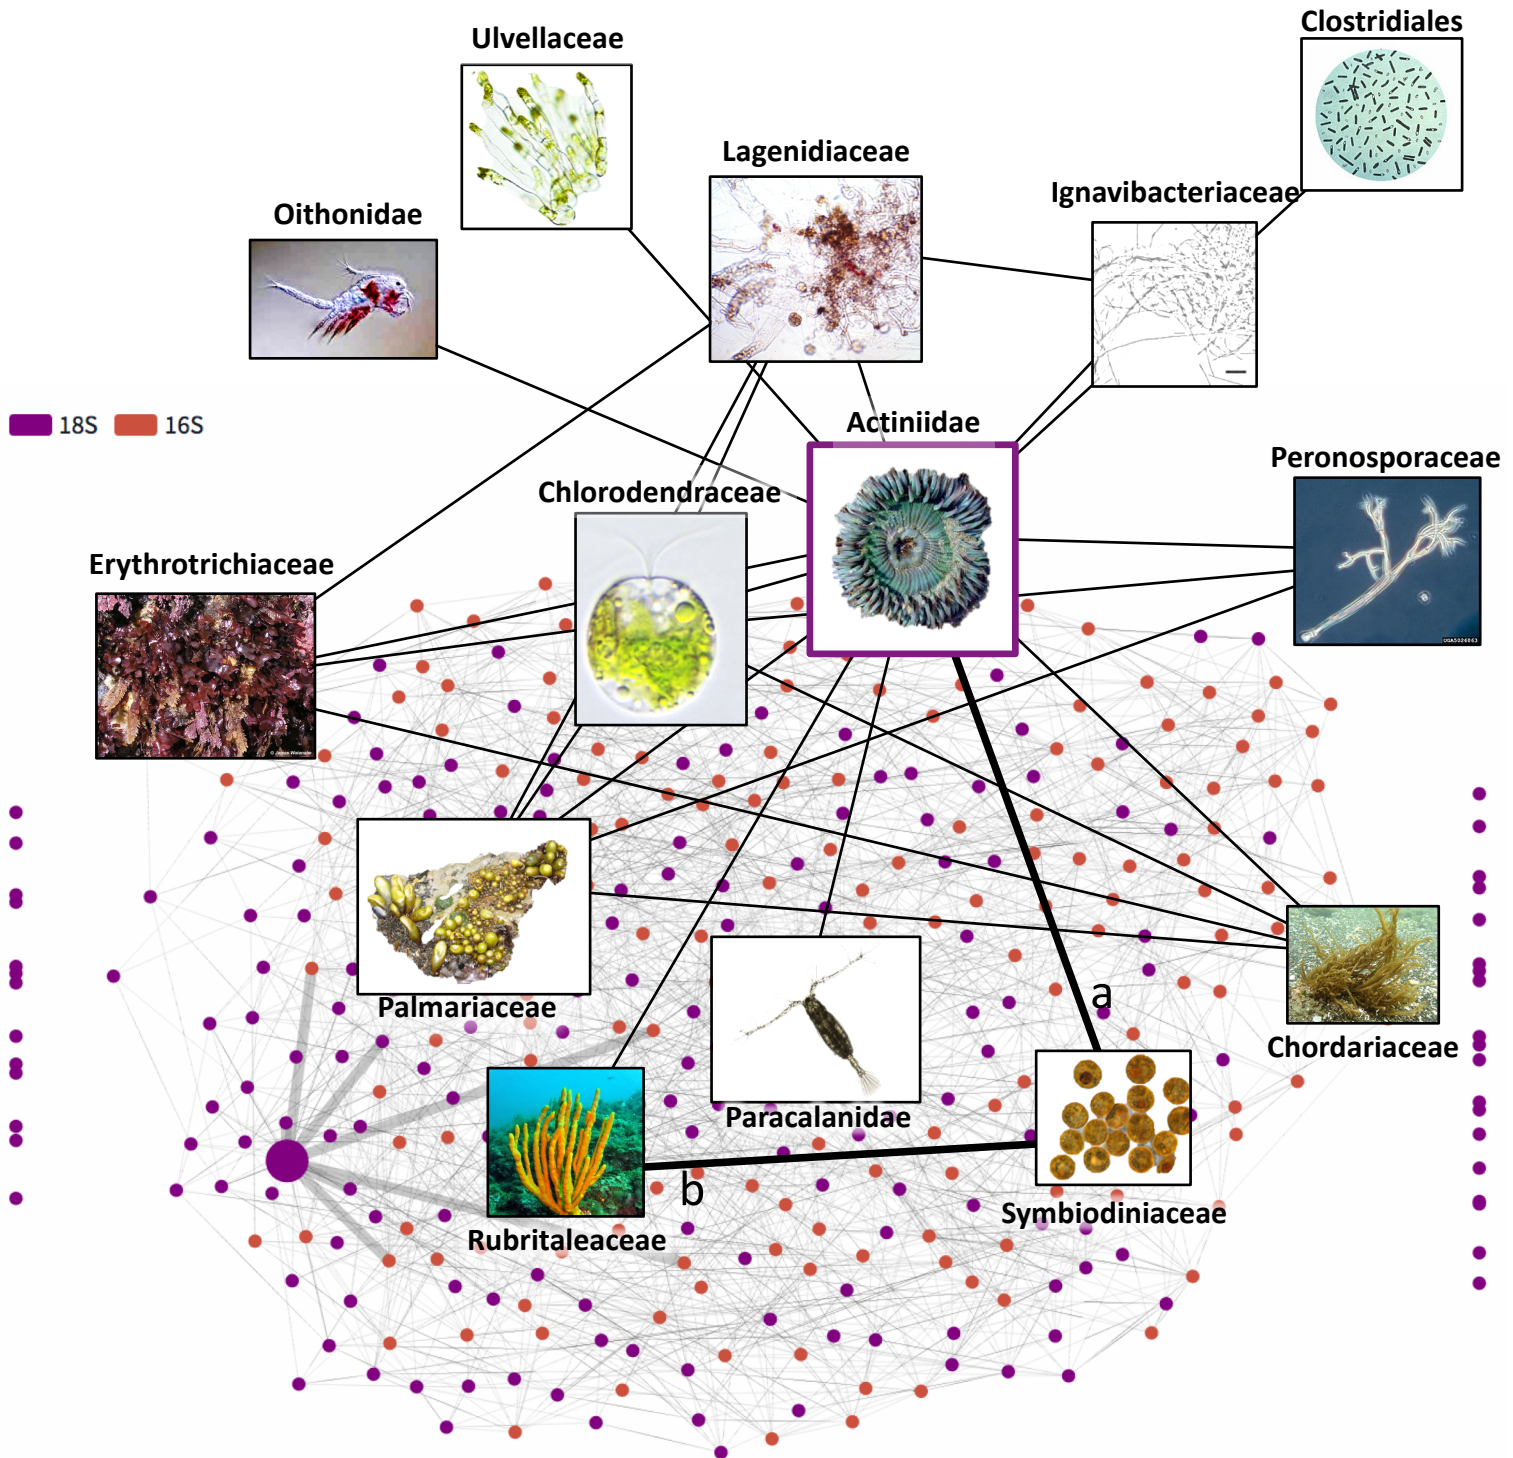

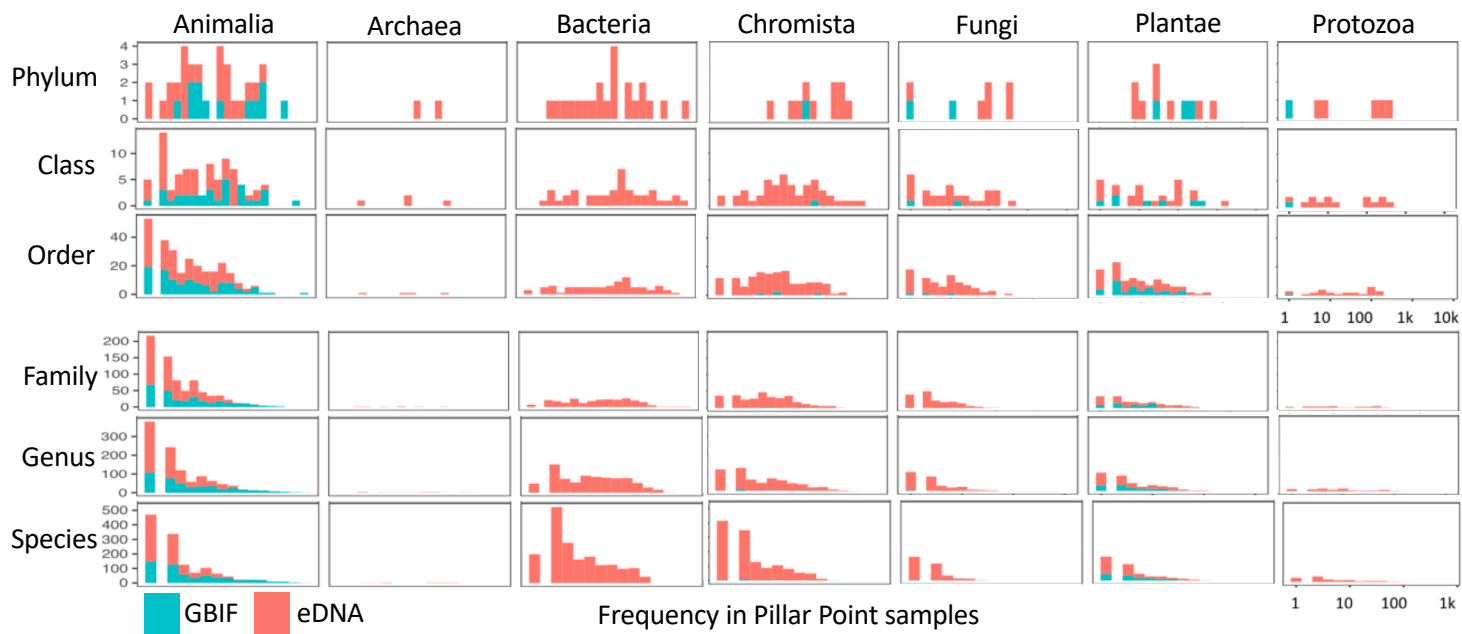

Source: https://www.biorxiv.org/content/10.1101/680272v2.full.pdf
